# Supplementary material
Source: ML conference proceedings conference paper supplement (https://openaccess.thecvf.com/content/CVPR2026/html/Nazarczuk_Charge_A_Comprehensive_CVPR_2026_paper.html)
Supplement: Supplementary file 1 [file supplementary.pdf › supplementary/supplementary.pdf]

# Charge: A Comprehensive Novel View Synthesis Benchmark and Dataset to Bind Them All

## Supplementary Material

### A. Supplementary Video

We attach a video presenting our dataset as supplementary material. The video presents the main characteristics of our dataset, including:

- large motions *i.e.* movements that are fast and long-range in space,
- rigid and non-rigid animation, *e.g.* articulated humanoid robot in contrast to a changing topology of a paint splash,
- a large dynamic content coverage of scenes (images include high dynamic to static content ratio),
- presence of open bound scene,
- intricate lighting.

Further, we present camera setups, including Dense, Sparse and Mono showing their relative position on the scene. Finally, we show the modalities included in our data, *i.e.* depth, segmentation, dynamic content mask, surface normals, and optical flow.

### B. Static setup details

We provide additional details on the static setup. This subset of images contains **112** frames per task. The number of frames varies per scene, with longer sequences sampling more frames. Within one sequence, the frames are subsampled in equal steps between the first and last. This constitutes an evaluation set manageable to be processed by feed-forward models in a reasonable time. The corresponding images are available in 3, 6, and 9 camera setups (Sparse), as well as 25 (Dense) camera configurations.

#### B.1. Evaluation

Hereafter, we detail the evaluation protocol on next generation foundational models. In the benchmark, we use training set images as the input for the model, with test cameras as the target views where applicable (Novel View Synthesis). We run the models in original resolutions, in which they were trained, which means significant downscaling (*e.g.* width of 518 for VGGT). We perform evaluation in native resolution of the dataset (2048x858), upscaling the predicted images. Notably, running the models in higher resolution, even though possible, yields worse performance.

#### B.2. Alignment

Typically, the predictions of feed-forward models are provided with an arbitrary scale, and often in the coordinate system of the first provided frame. Therefore, to use target camera poses for rendering, one needs to align them to

the coordinate system in which predictions are provided. To this end, we distinguish two main protocols present in the literature.

In the first, we align the target cameras to the model predictions with the Umeyama algorithm [37]. In this algorithm, a global rotation and scaling factor are predicted by minimising the least square error between predicted source camera positions and transformed ground truth source camera positions. In our belief, this constitutes the fairest evaluation protocol accounting for the prediction quality of camera poses, geometry, and appearance. Notably, however, this is very sensitive to misalignments and may not reflect the appearance qualities of the rendered images.

Alternatively, we follow the protocol suggested in AnySplat [12]. In this approach, we run the model with the source views as the input and save the predictions. Consequently, we run the model again on the set of images consisting of both source and target views. Further, we rescale the poses predicted in the second run such that the positions match the first one. We discard any data from the second run apart from new target poses. We use those to render the target images. While this approach is arguably more common in literature, it requires the use of test images, which may not always be available. However, given still imperfect predictions of the current models, it allows for more appearance-focused evaluation as it largely mitigates degradation of metrics due to misalignment.

### C. Field of View Overlap

In this section, we extend the analysis of the proposed field of view overlap parameter. In the main manuscript, we propose to calculate the projection of a test image plane into training views and calculate  $FOV_O$  based on a weighted average across all corresponding training views. This serves as an estimation of camera coverage between test and training views and can be treated as a proxy for the difficulty of reconstruction.

Notably, the value of such a parameter is dependent on the depth in which we place the projection plane. Here, we consider 3 possible scenarios:

- ground truth depth values for corners of the image plane,
- median value of the true depth in the whole image,
- reasonably chosen custom value (here, we set it to  $5m$  for all scenes).

In Table 6, we present the values of the field of view overlap for the presented experiments setups for all the aforementioned ways of calculation. We can observe that in a

Table 6. Field of view overlap values calculated per scene for each experiment setup (values for all Mono setups averaged).

|            | Scene    | Real | Median | Custom |
|------------|----------|------|--------|--------|
| Dense      | 010_0050 | 0.63 | 0.67   | 0.67   |
|            | 020_0020 | 0.76 | 0.80   | 0.91   |
|            | 040_0040 | 0.63 | 0.85   | 0.85   |
|            | 050_0130 | 0.42 | 0.43   | 0.45   |
|            | 050_0160 | 0.55 | 0.59   | 0.60   |
|            | 060_0100 | 0.68 | 0.73   | 0.75   |
|            | 060_0130 | 0.63 | 0.68   | 0.68   |
|            | 070_0123 | 0.37 | 0.84   | 0.93   |
| Sparse - 3 | 010_0050 | 0.50 | 0.51   | 0.51   |
|            | 020_0020 | 0.62 | 0.63   | 0.71   |
|            | 040_0040 | 0.55 | 0.61   | 0.61   |
|            | 050_0130 | 0.34 | 0.34   | 0.36   |
|            | 050_0160 | 0.53 | 0.54   | 0.55   |
|            | 060_0100 | 0.61 | 0.64   | 0.64   |
|            | 060_0130 | 0.51 | 0.52   | 0.52   |
|            | 070_0123 | 0.32 | 0.62   | 0.73   |
| Sparse - 6 | 010_0050 | 0.59 | 0.60   | 0.60   |
|            | 020_0020 | 0.72 | 0.73   | 0.81   |
|            | 040_0040 | 0.65 | 0.70   | 0.70   |
|            | 050_0130 | 0.37 | 0.38   | 0.40   |
|            | 050_0160 | 0.61 | 0.62   | 0.63   |
|            | 060_0100 | 0.72 | 0.74   | 0.74   |
|            | 060_0130 | 0.59 | 0.59   | 0.60   |
|            | 070_0123 | 0.34 | 0.71   | 0.84   |
| Sparse - 9 | 010_0050 | 0.59 | 0.60   | 0.60   |
|            | 020_0020 | 0.74 | 0.76   | 0.86   |
|            | 040_0040 | 0.66 | 0.73   | 0.73   |
|            | 050_0130 | 0.39 | 0.40   | 0.42   |
|            | 050_0160 | 0.61 | 0.64   | 0.64   |
|            | 060_0100 | 0.72 | 0.76   | 0.76   |
|            | 060_0130 | 0.61 | 0.62   | 0.62   |
|            | 070_0123 | 0.37 | 0.74   | 0.88   |
| Mono       | 010_0050 | 0.34 | 0.36   | 0.36   |
|            | 020_0020 | 0.43 | 0.45   | 0.49   |
|            | 040_0040 | 0.43 | 0.48   | 0.48   |
|            | 050_0130 | 0.39 | 0.39   | 0.39   |
|            | 050_0160 | 0.36 | 0.38   | 0.38   |
|            | 060_0100 | 0.40 | 0.42   | 0.42   |
|            | 060_0130 | 0.39 | 0.41   | 0.41   |
|            | 070_0123 | 0.36 | 0.48   | 0.49   |

majority of cases, all values for the given scene are similar for all 3 methods. Additionally, in most cases, the relative ranking is preserved. We note that the main discrepancy can be seen for scene 070\_0123 in Dense and Sparse setups. This is caused by the fact that this scene is mainly covered by a closeup of an action scene occupying the centre of the field of view. Arguably, in such a case the median value of depth should be more representative with respect to the visibility of pixels between the views.

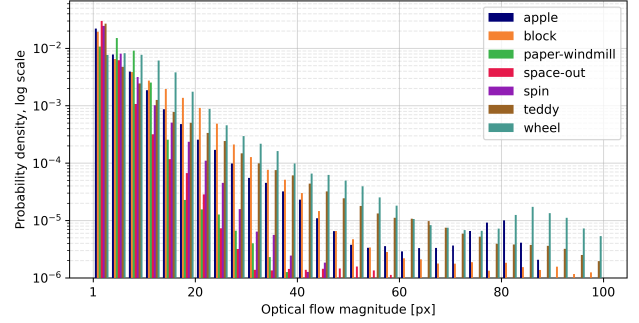

Figure 7. Optical flow histogram for DyCheck dataset.

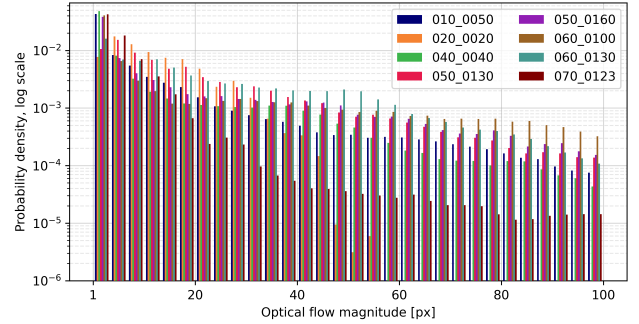

Figure 8. Optical flow histogram for Charge dataset.

In summary, we argue that the proposed field of view overlap ( $FOV_O$ ) metric is a good indicator of spatial co-visibility between test and training views. Additionally, it is not highly sensitive to the used estimation of depth making it available for use with no ground truth depth available.

## D. Optical flow details

In Figure 3 we presented a histogram comparing the density of the magnitude of the optical flow for DyCheck and Charge datasets. DyCheck is recognised as the main benchmarking dataset in monocular video reconstruction. We note that Charge presents a significantly larger variety of movement, *i.e.* covering a large distance in the captured frames. Additionally, in Figure 7 and Figure 8 we present detailed histograms of the magnitude of the optical flow for separate scenes of DyCheck and Charge respectively. We see very little high-magnitude movement in DyCheck, whereas motion in Charge ranges from lower scale, *e.g.* human in a distance in 020\_0020, up to very dynamic action as in *e.g.* 060\_0100.

## E. Real-world datasets similarity

We argue that Charge consists of high-quality animations resembling real-world dynamism and texture intricacy. To showcase similarity to real-world datasets, we propose to



Table 7. FID of selected datasets with DyCheck as a reference.

| Dataset | Charge | Neural 3D Video | Technicolor |
|---------|--------|-----------------|-------------|
| FID     | 15.39  | 14.14           | 16.87       |

use the Fréchet inception distance (FID) as the measurement. The metric is commonly used in image generation tasks, and it is a measure of the diversity of the target dataset with respect to the reference dataset. We set DyCheck as the reference dataset (distribution) and calculate FID for Charge, Neural 3D Video, and Technicolor. We present the results in Table 7. Notably, Charge obtains a lower FID score than Technicolor, and a slightly higher FID value than Neural 3D Video. This suggests that Charge distribution is reasonably similar in terms of realism and diversity to that of DyCheck, *i.e.* Charge is as similar (or dissimilar) to a real-world dataset (DyCheck) as the real-world datasets are between each other.

## F. Detailed Results - Static

In this section, we present additional results for the static benchmarking of 3D foundational models. In Figure 9 and Figure 11, we present the results of novel view synthesis corresponding to Table 5 for the Sparse and Dense setup, respectively. Similarly, Figure 10 and Figure 12 present visualisations of depth predictions. Further, we report additional metrics for camera pose estimation, depth estimation and novel view synthesis in Tables 9, 10 and 11, respectively. Finally, we include detailed results for every scene in Tables 12, 13, 14 and 15 (camera pose), Tables 16, 17, 18 and 19 (depth), and Tables 20 and 21 (NVS).

The additional metrics for camera pose estimation and depth estimation mostly preserve the same relative ranking of the methods. This correlates with observations made about depth visualisations. Notably,  $\pi^3$  seems to provide the sharpest and detailed depth maps, *e.g.* in Figure 12, we can see it being the only method preserving the details of the bridge in the background of scene 060\_0100. Per-scene results suggest that models struggle the most with scenes with larger depth discrepancies between foreground and background.

Further, the additional metrics and renderings for novel view synthesis provide further insight into the sources of errors. Notably, in Table 11, we observe that WorldMirror outperforms AnySplat in PSNR, SSIM, and LPIPS, yet the values of MUSIQ are consistently higher for AnySplat. Similarly, visual inspection of Figures 9 and 11 suggests that AnySplat produces sharper, more detailed images *e.g.* person facial features or paint splash in Figure 9. Notably, between the two methods and two different alignment algorithms, we observe some misalignments in the produced test views. This emphasises the importance of camera pose es-

Table 8. Quantitative evaluation results of static and rig cameras in the Mono setup.

|                       | 4DGS  |        | D-3DGS |        | SC-GS |        | MoSca |        |
|-----------------------|-------|--------|--------|--------|-------|--------|-------|--------|
|                       | PSNR  | PSNR-D | PSNR   | PSNR-D | PSNR  | PSNR-D | PSNR  | PSNR-D |
| <b>Rig cameras</b>    |       |        |        |        |       |        |       |        |
| <b>SF</b>             | 26.48 | 24.24  | 26.60  | 24.38  | 26.07 | 25.25  | 21.31 | 21.36  |
| <b>SS</b>             | 25.84 | 23.53  | 25.81  | 24.16  | 25.16 | 24.10  | 23.10 | 22.00  |
| <b>WF</b>             | 26.63 | 24.58  | 26.09  | 24.26  | 24.99 | 24.80  | 22.60 | 21.85  |
| <b>WS</b>             | 24.80 | 22.96  | 24.19  | 22.80  | 23.28 | 22.95  | 24.51 | 23.55  |
| <b>Static cameras</b> |       |        |        |        |       |        |       |        |
| <b>SF</b>             | 23.23 | 21.14  | 23.15  | 21.45  | 21.88 | 21.88  | 25.48 | 24.32  |
| <b>SS</b>             | 22.53 | 20.38  | 22.55  | 20.90  | 21.42 | 20.99  | 23.81 | 23.66  |
| <b>WF</b>             | 22.93 | 21.00  | 22.59  | 20.85  | 20.80 | 21.29  | 25.04 | 23.68  |
| <b>WS</b>             | 21.95 | 20.40  | 21.52  | 20.42  | 20.44 | 20.51  | 24.07 | 23.68  |

timation in the foundational 3D models. WorldMirror produces more accurate camera pose estimation, which affects the novel view synthesis metrics when compared to ground truth. This affirms that current foundational models with novel view capabilities produce a geometry that resolves training images in the predicted cameras, which does not have to correspond to the ground truth camera pose and geometry pair.

## G. Detailed Results - Dynamic

In Table 8 we provide additional results for the Mono setup separated into static cameras, and cameras moving together with the training camera (Rig cameras). We note that one-stage methods (4DGS, D-3DGS, SC-GS) perform better on rig cameras, whereas MoSca on static ones. This shows that without heavy geometrical constraints (such as MoSca), methods overfit to training trajectory shown by higher performance in the local neighbourhood of the training view. We believe including both types of target cameras provides a fuller overview of the performance of the method.

In addition, we present detailed results of all dynamic experiments. In Table 22 we show per-scene results for Dense setup. Similarly, Figure 13 shows additional qualitative examples. Interestingly, the hardest scene for the benchmarked methods was 040\_0040 which is the longest scene that also contains a large amount of movement, specifically a character moving towards the camera rig. Similarly, 070\_0123 poses a significant challenge, it is a scene with a close-up interaction between a humanoid robot and a human in which the dynamic content covers a large part of the field of view and introduces a lot of occluded parts between training views.

Table 23 and Table 24 show results for Sparse setup - configurations with 3, 6, 9 input views. Figure 14 shows additional qualitative examples for all the configurations. It shows varying performance for all the methods depending

on the scene. Notably, STG relies on point cloud initialisation for all frames, in contrast to 4DGS and Ex4DGS, showing more dependence on priors and lower performance in a low camera regime setup.

Finally, Tables 25 and 26 present results for Mono setup in Spline Fast and Slow, and Random Walk Fast and Slow configurations respectively. Figure 15 shows additional corresponding qualitative examples. Interestingly, MoSca, which is the current state of the art on DyCheck dataset (by a significant margin), has a relatively lower performance in our benchmark. We believe this emphasises the shortcomings of the approach, and DyCheck dataset. We believe that lower performance of MoSca on Charge can be attributed to the nature of algorithm being catered towards DyCheck data. Namely, the optimisation is performed in several stages, of which the main are: preprocessing - obtaining priors, geometrical optimisation, photometric optimisation. MoSca applies a lot of geometrical constraints in the optimisation process, such as on velocity and acceleration of gaussians, as well as rigidity between neighbouring gaussians. This creates the more compact 3D scene representation, however, leads to decrease in performance in neighbouring views (to which other methods may be overfitted) - see rig cameras against static cameras in Table 8. Similarly, MoSca applies 2D tracking loss based on previously extracted prior. This ties the performance of the reconstruction algorithm to the quality of tracking prior. Tracking algorithms perform better on DyCheck than Charge due to motion being more regular and less dynamic. Additionally, DyCheck test views are placed far away from training camera trajectory. Such a benchmark benefits greatly from having a compact representation, in contrast to placing more gaussians in front of the camera (essentially overfitting to training trajectory) which increases neighbouring view performance. Therefore, we believe it is crucial to have a balanced evaluation such as Charge. Finally, DyCheck provides inaccurate camera poses (due to noisy measurements and sensor drift), and state of the art algorithms perform test time camera optimisation to mitigate that. Essentially, these methods optimise test camera poses such that novel view metrics are maximised. This process entangles the process of reconstruction and camera optimisation, and does not allow for objective assessment of underlying 4D reconstruction. Given the current performance of dynamic-scene camera pose estimation methodologies, we argue that a synthetic dataset such as Charge is the only reliable tool for a fully transparent evaluation, specially for moving monocular videos of dynamic scenes.

## H. Rendering setup

Charge was rendered in Blender 4.0.2 with the use of Cycles as the rendering engine. The most important settings include a resolution of  $2048 \times 858$ , 256 samples for path

tracing, a camera with a focal length of 25mm or 20mm (depending on the scene), and a sensor size of 25mm (original Charge camera settings).

**Setup:** The scenes were rendered on servers each equipped with 4 Volta GPUs and a 16-cores (32 threads) of Intel Xeon 8160 CPU. The equivalent rendering time of the whole dataset with one unit of this setup is equal to roughly 1 year.

**License:** Blender Open Movies is a subscription library offering movie production assets under a Creative Commons Attribution 4.0 license. This allows for modification and redistribution under the attribution condition. Charge creators can be found at <https://studio.blender.org/projects/charge/pages/credits/> and are also linked at the dataset download website.

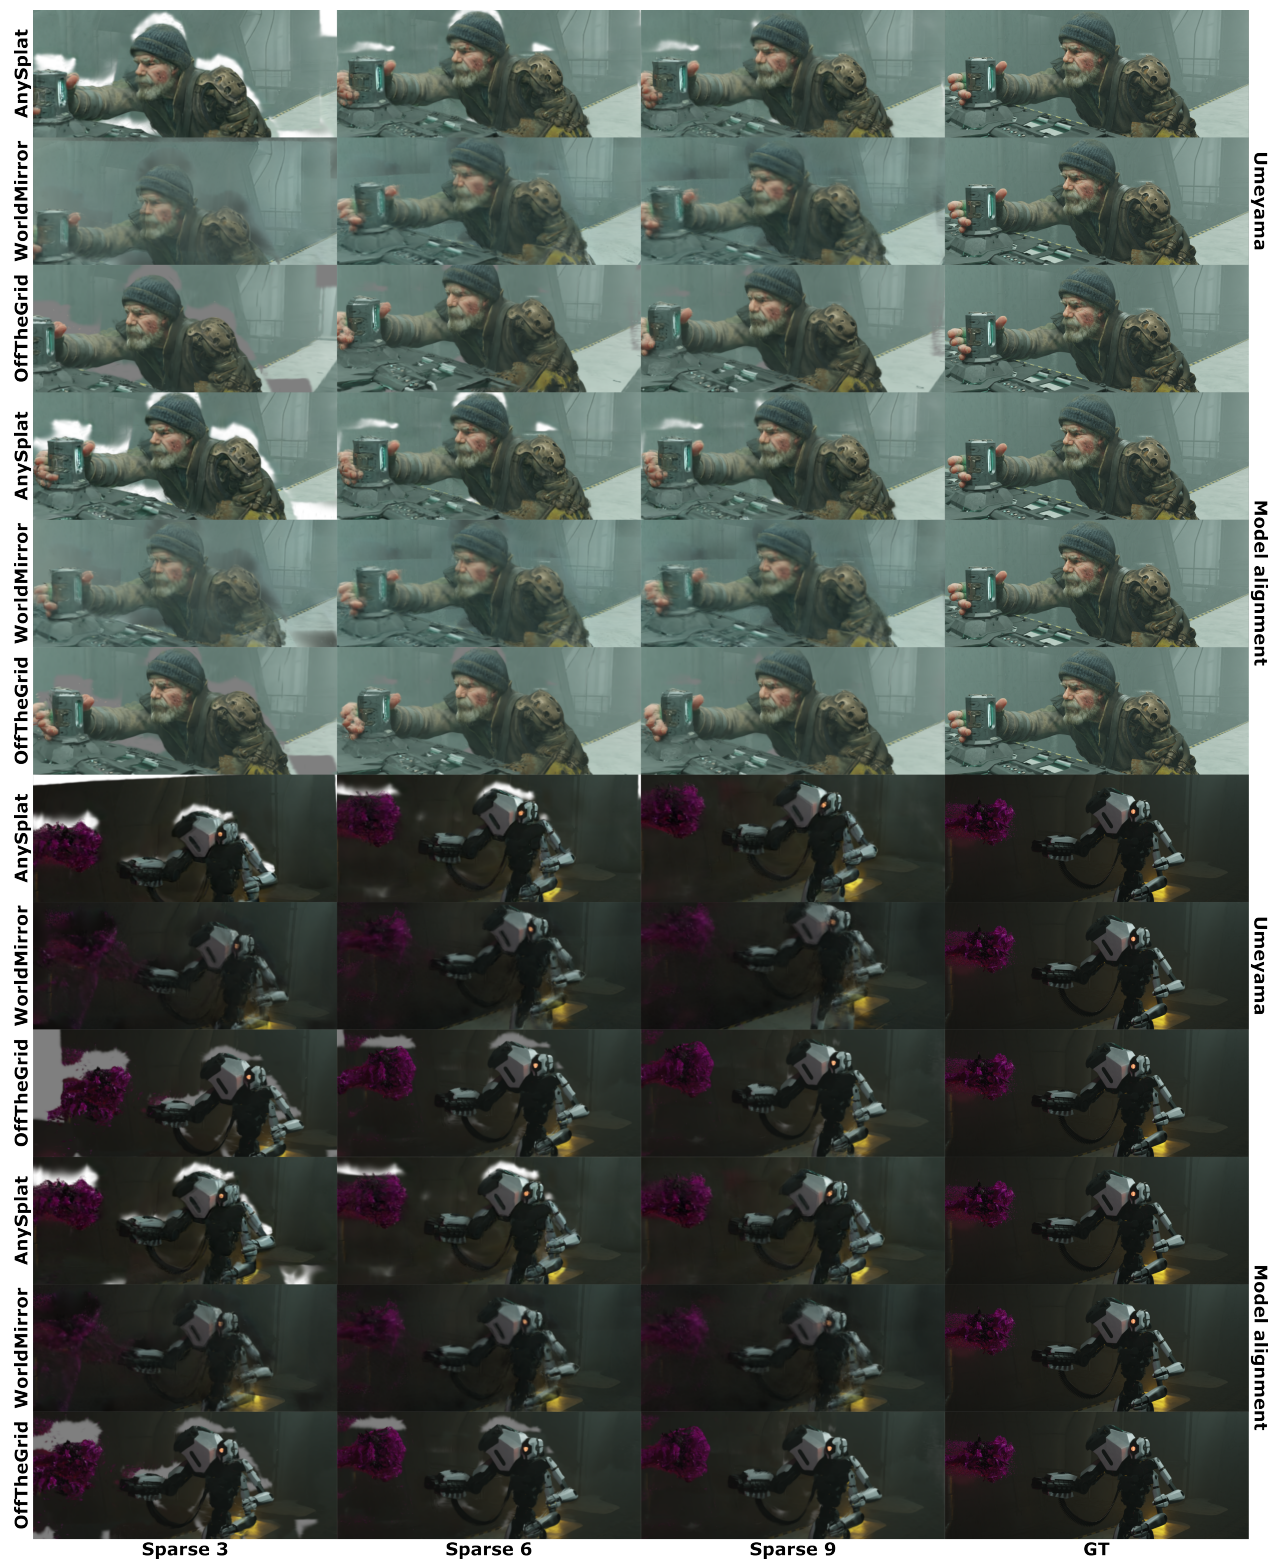

Figure 9. Example results of rendering in Charge dataset evaluation - Static Sparse setup. Best viewed zoomed in.



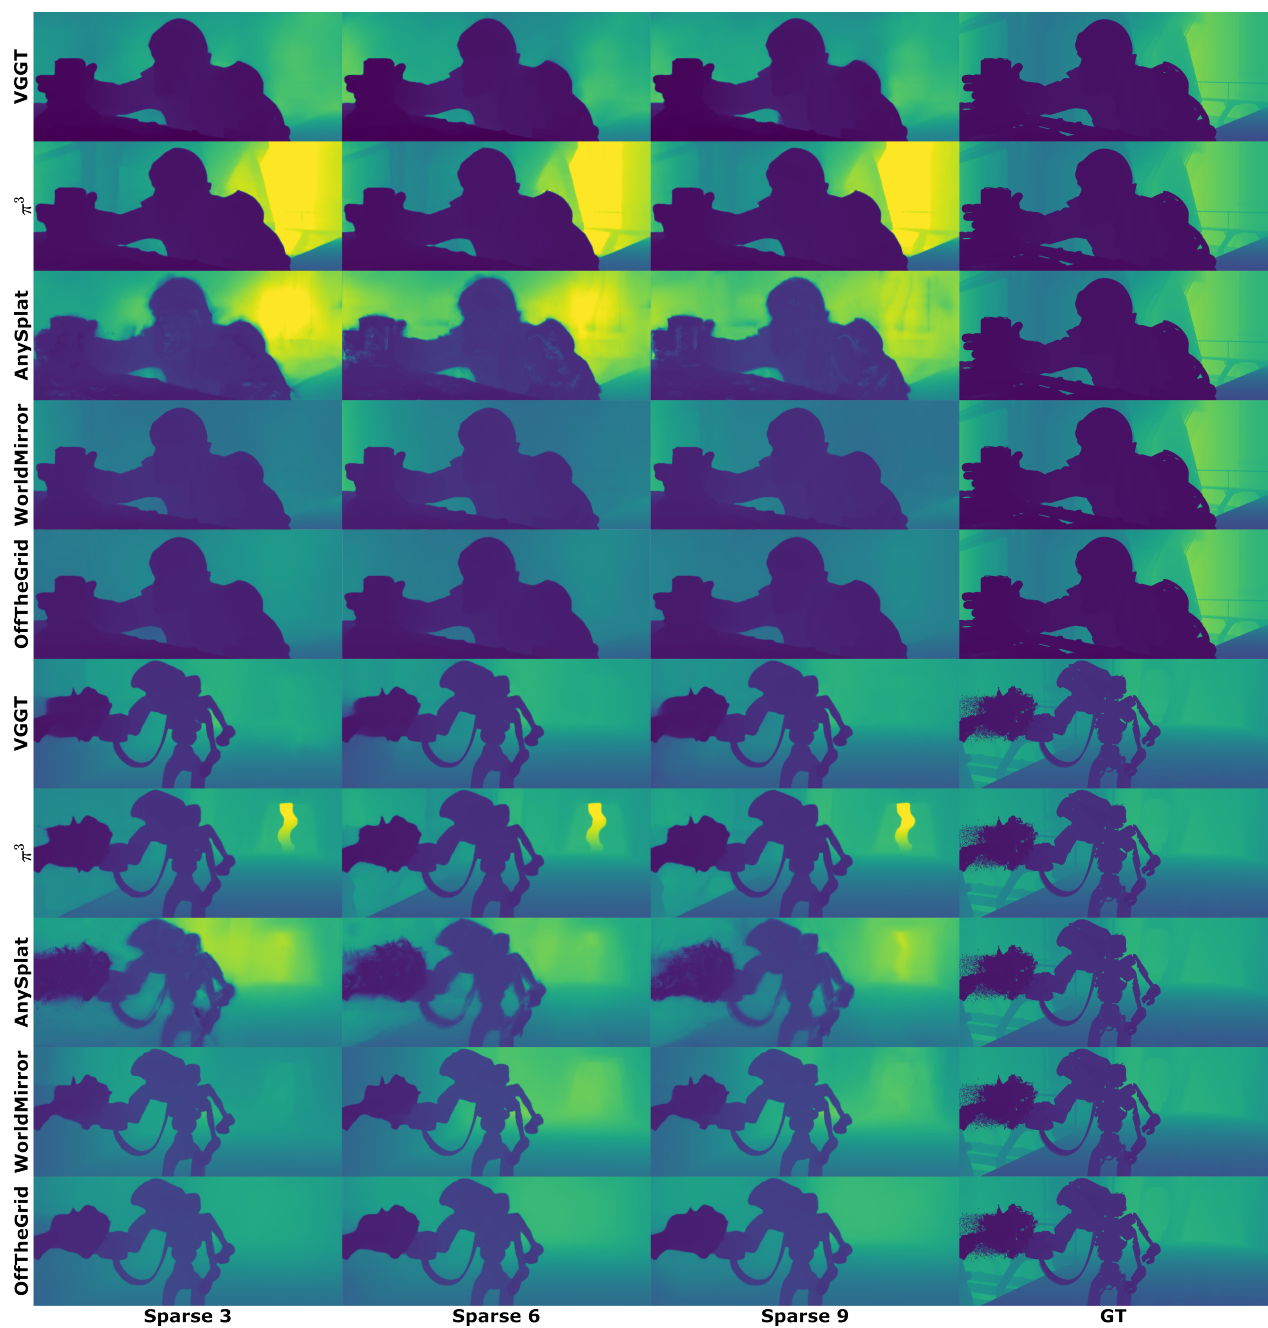

Figure 10. Example visualisation of depth estimation in Charge dataset evaluation - Static Sparse setup. Best viewed zoomed in.

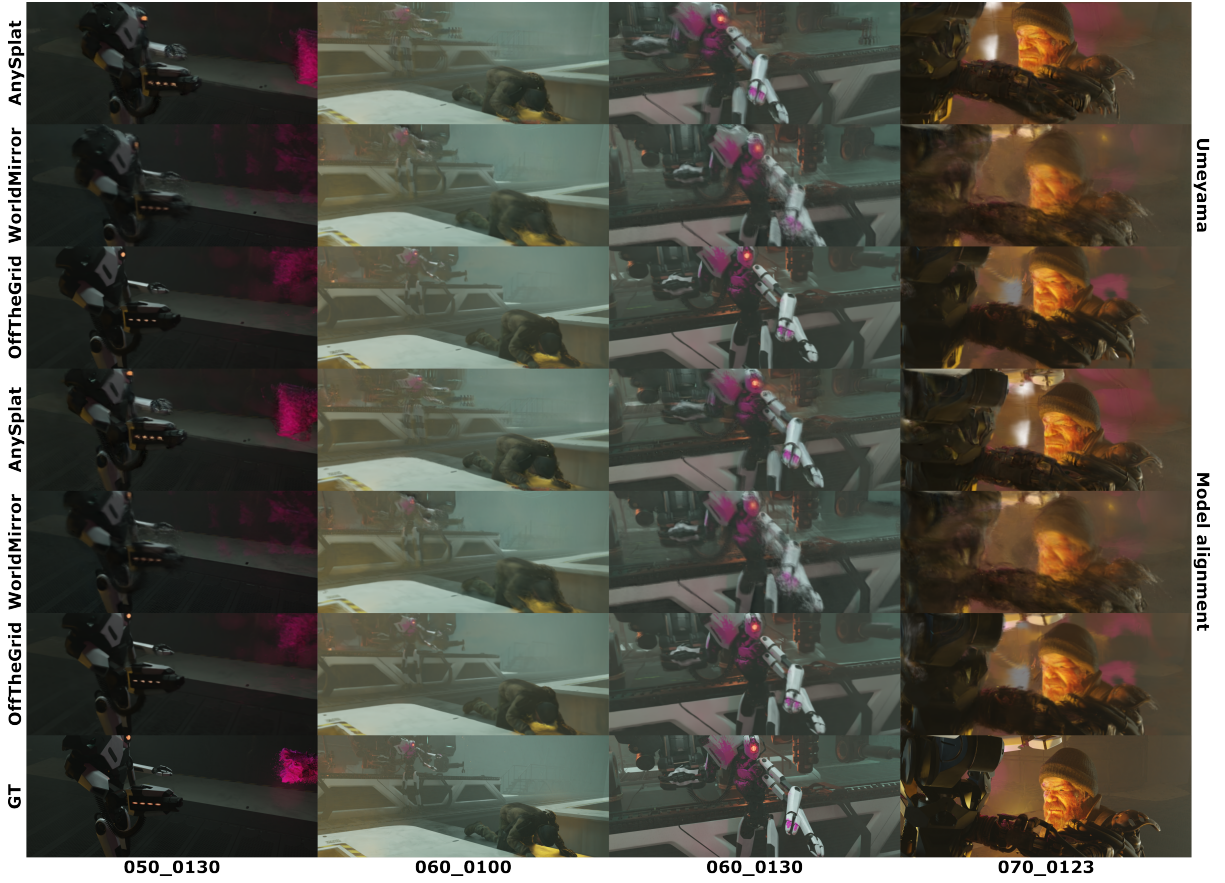

Figure 11. Example results of rendering in Charge dataset evaluation - Static Dense setup. Best viewed zoomed in.

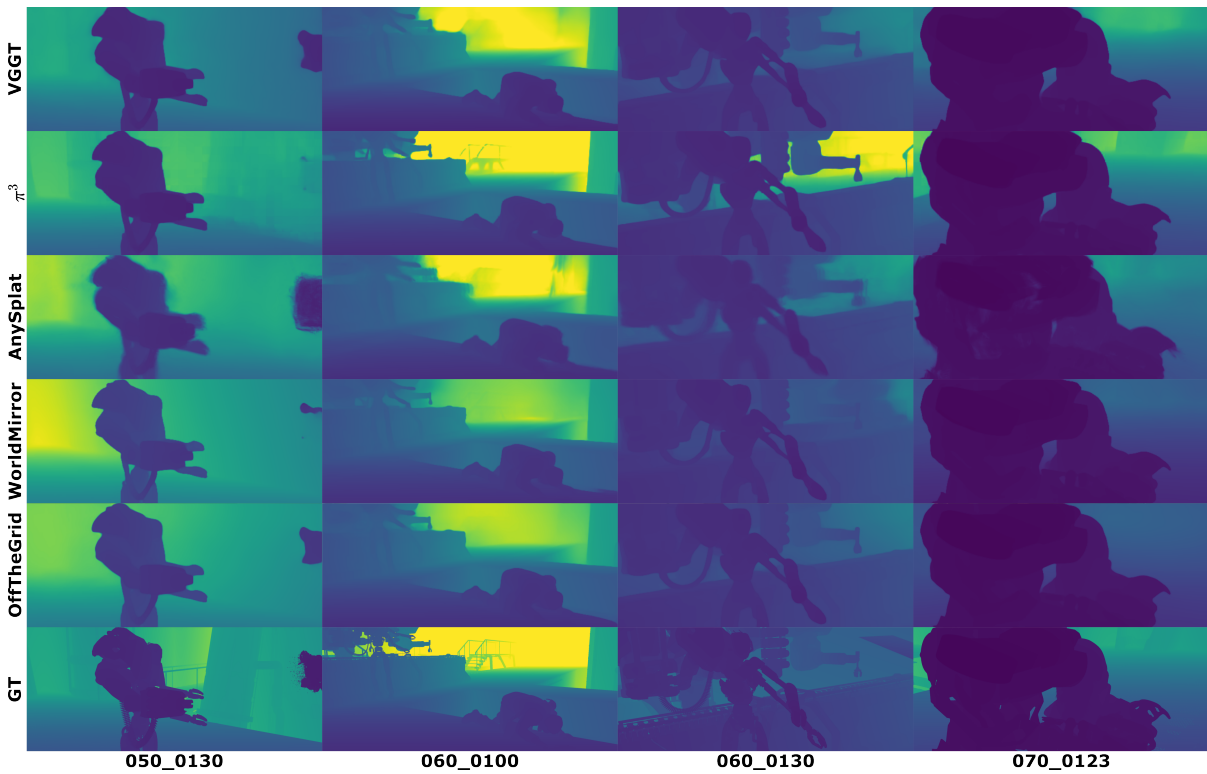

Figure 12. Example visualisation of depth estimation in Charge dataset evaluation - Static Dense setup. Best viewed zoomed in.



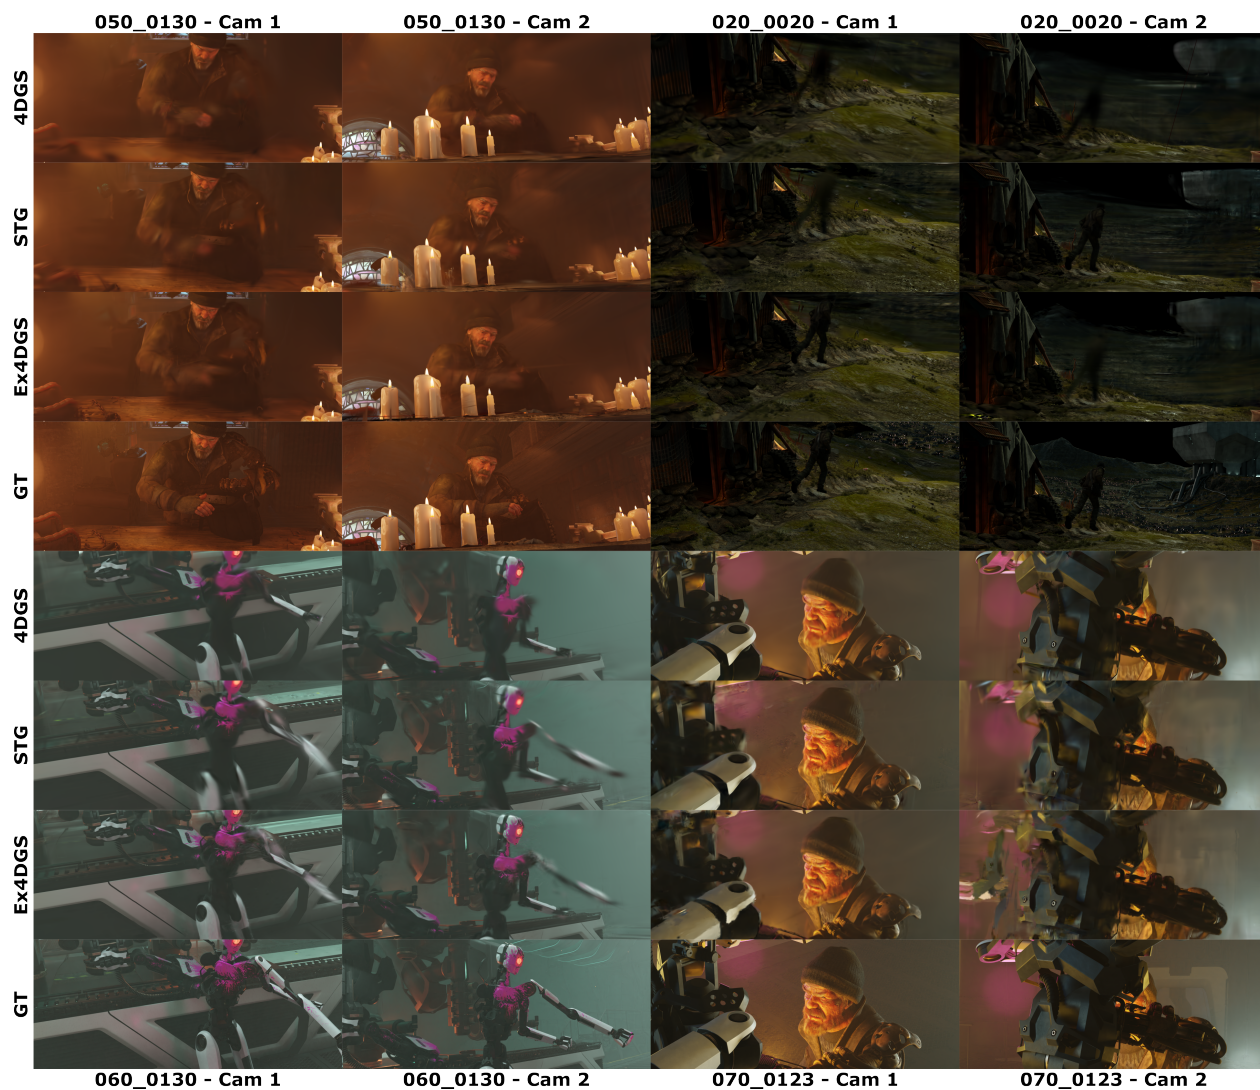

Figure 13. Example results of rendering in Charge dataset evaluation - Dense setup. Best viewed zoomed in.



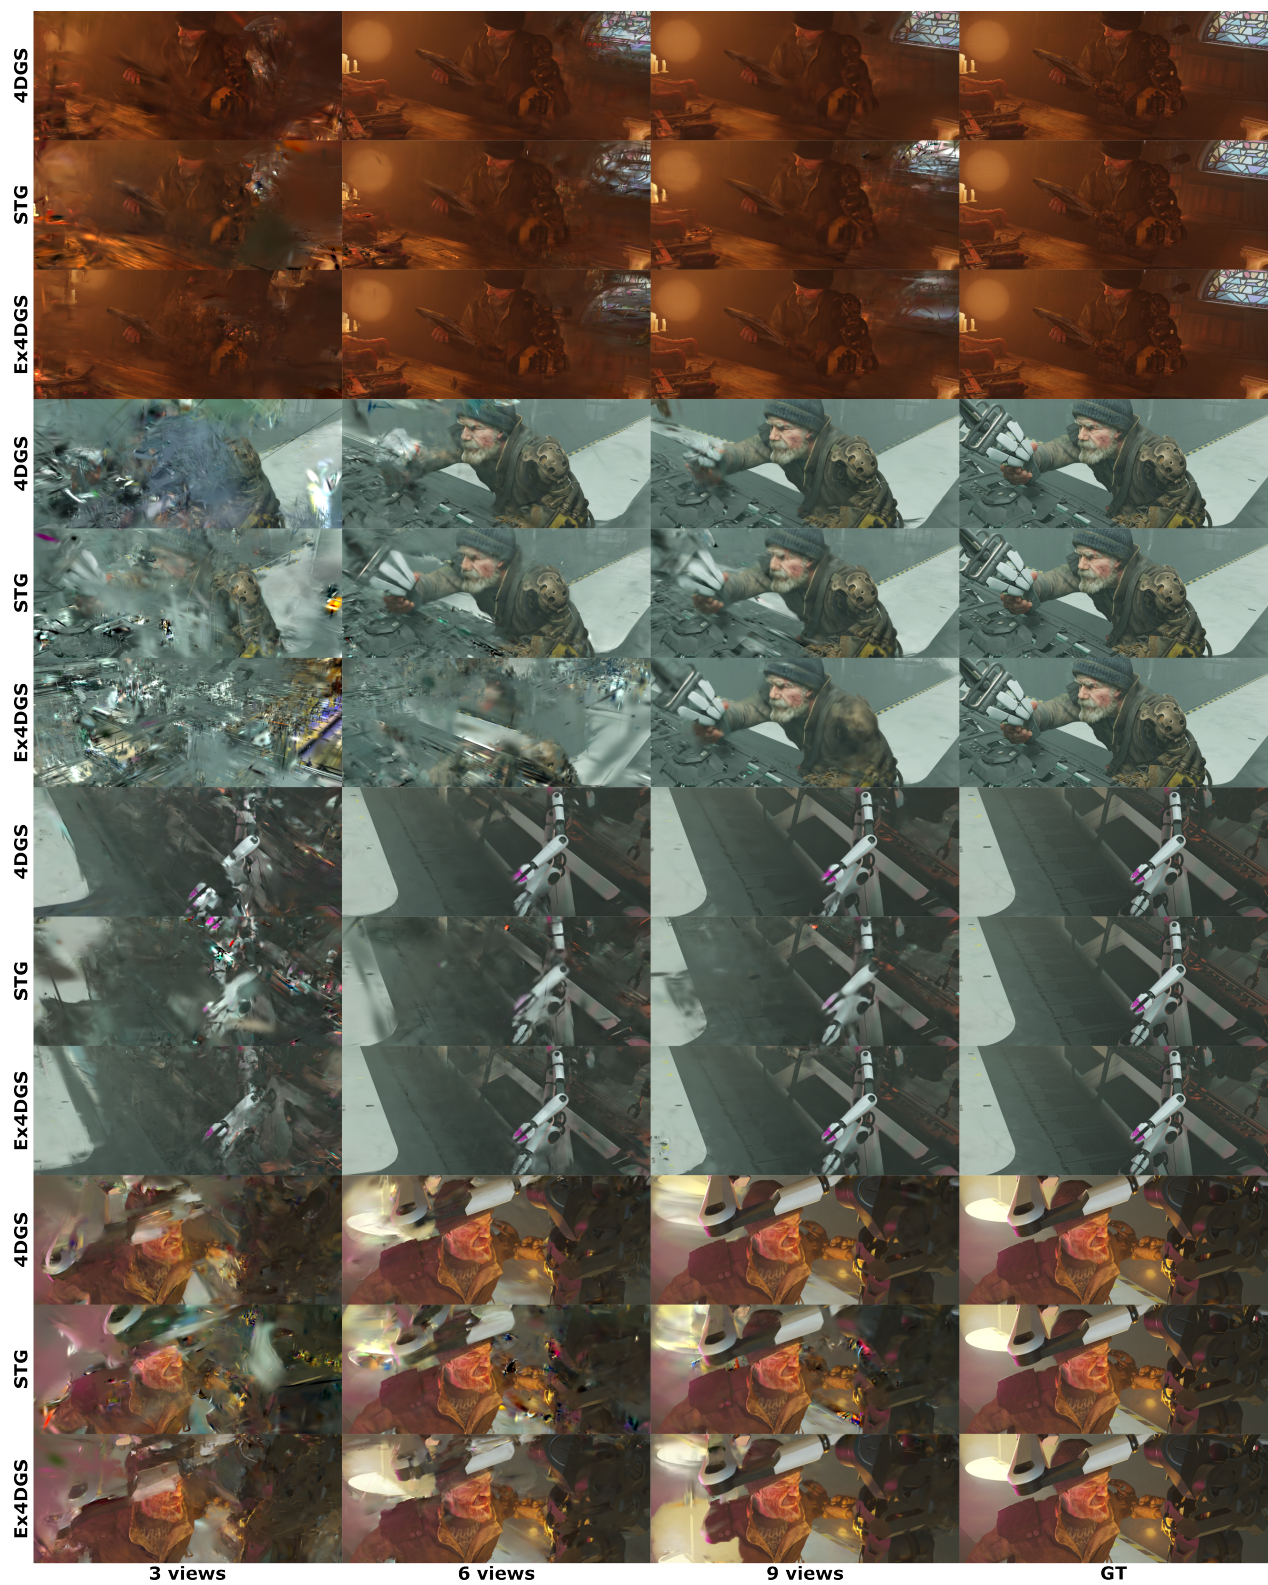

Figure 14. Example results of rendering in Charge dataset evaluation - Sparse setup. Top to bottom scenes: 010\_0050, 040\_0040, 060\_0130, 070\_0123. Best viewed zoomed in.



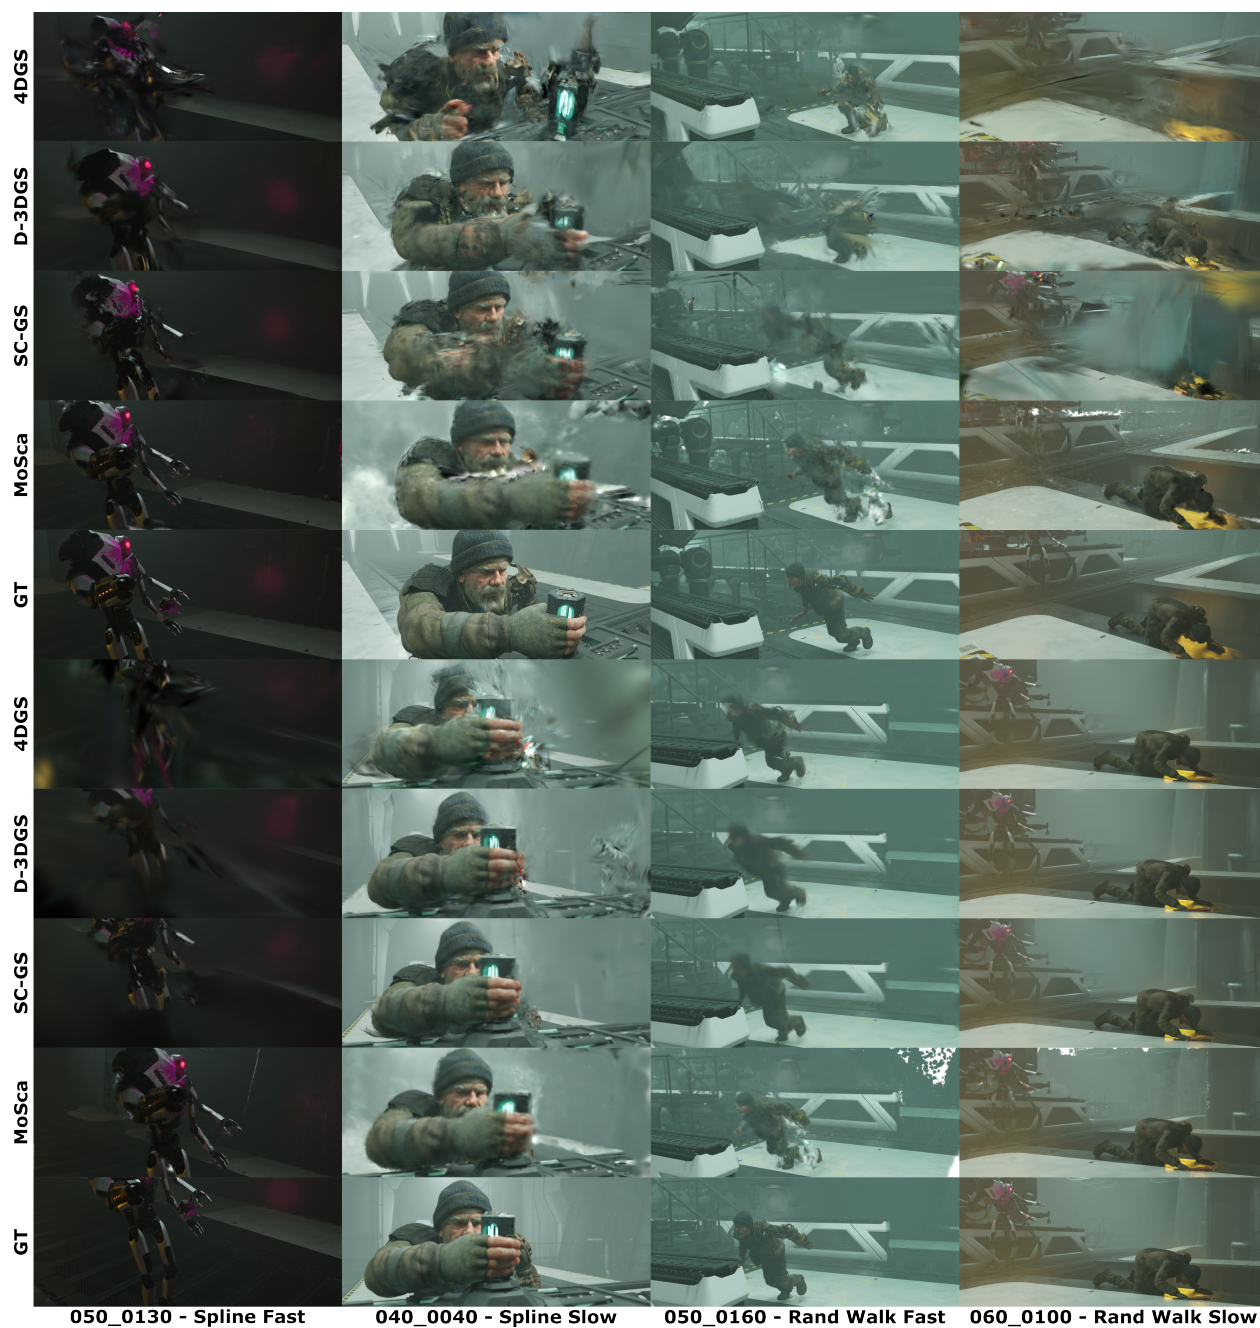

Figure 15. Example results of rendering in Charge dataset evaluation - Mono setup, selected trajectory types. Top half - static cameras, bottom half - rig cameras. Best viewed zoomed in.

Table 9. Averaged camera pose estimation metrics. Sparse setup with 3, 6, 9 input views and Dense setup with 25 input views.

|            | Method            | RRA@5  | TRA@5  | TRA@10 | TRA@15 | TRA@20 | AUC@5  | AUC@10 | AUC@15 | AUC@20 | AUC@30 |
|------------|-------------------|--------|--------|--------|--------|--------|--------|--------|--------|--------|--------|
| Sparse - 3 | VGGT [39]         | 1.0000 | 0.6726 | 0.9732 | 0.9970 | 1.0000 | 0.3581 | 0.6418 | 0.7599 | 0.8211 | 0.8809 |
|            | $\pi^3$ [41]      | 0.9226 | 0.4256 | 0.9196 | 0.9732 | 0.9821 | 0.1900 | 0.4778 | 0.6376 | 0.7231 | 0.8127 |
|            | AnySplat [12]     | 0.8720 | 0.7976 | 0.9851 | 1.0000 | 1.0000 | 0.2827 | 0.6096 | 0.7394 | 0.8050 | 0.8708 |
|            | WorldMirror [24]  | 1.0000 | 0.5982 | 0.9048 | 0.9732 | 0.9940 | 0.3547 | 0.5960 | 0.7148 | 0.7834 | 0.8555 |
|            | Off The Grid [27] | 1.0000 | 0.9137 | 0.9940 | 1.0000 | 1.0000 | 0.5397 | 0.7622 | 0.8421 | 0.8821 | 0.9216 |
| Sparse - 6 | VGGT [39]         | 1.0000 | 0.7881 | 0.9756 | 0.9982 | 1.0000 | 0.5009 | 0.7155 | 0.8086 | 0.8567 | 0.9046 |
|            | $\pi^3$ [41]      | 0.9994 | 0.6238 | 0.9357 | 0.9988 | 1.0000 | 0.2844 | 0.5727 | 0.7118 | 0.7845 | 0.8565 |
|            | AnySplat [12]     | 0.9744 | 0.8119 | 0.9827 | 0.9976 | 1.0000 | 0.3751 | 0.6613 | 0.7733 | 0.8304 | 0.8871 |
|            | WorldMirror [24]  | 1.0000 | 0.8214 | 0.9804 | 0.9982 | 1.0000 | 0.5049 | 0.7272 | 0.8164 | 0.8624 | 0.9087 |
|            | Off The Grid [27] | 1.0000 | 0.8893 | 0.9905 | 0.9982 | 1.0000 | 0.5907 | 0.7829 | 0.8551 | 0.8916 | 0.9281 |
| Sparse - 9 | VGGT [39]         | 1.0000 | 0.8214 | 0.9707 | 0.9973 | 1.0000 | 0.5188 | 0.7278 | 0.8161 | 0.8624 | 0.9087 |
|            | $\pi^3$ [41]      | 1.0000 | 0.6032 | 0.9603 | 0.9998 | 1.0000 | 0.2886 | 0.5804 | 0.7183 | 0.7892 | 0.8596 |
|            | AnySplat [12]     | 0.9727 | 0.7986 | 0.9777 | 0.9958 | 1.0000 | 0.3731 | 0.6527 | 0.7667 | 0.8250 | 0.8837 |
|            | WorldMirror [24]  | 1.0000 | 0.8105 | 0.9750 | 0.9933 | 0.9988 | 0.4919 | 0.7147 | 0.8066 | 0.8546 | 0.9032 |
|            | Off The Grid [27] | 1.0000 | 0.9087 | 0.9829 | 0.9965 | 0.9998 | 0.6068 | 0.7919 | 0.8589 | 0.8947 | 0.9301 |
| Dense      | VGGT [39]         | 0.9998 | 0.8051 | 0.9456 | 0.9850 | 0.9966 | 0.5149 | 0.7141 | 0.8011 | 0.8495 | 0.8996 |
|            | $\pi^3$ [41]      | 0.9983 | 0.7374 | 0.9529 | 0.9901 | 0.9966 | 0.4071 | 0.6537 | 0.7634 | 0.8215 | 0.8807 |
|            | AnySplat [12]     | 0.9761 | 0.7333 | 0.9824 | 0.9984 | 0.9998 | 0.3359 | 0.6298 | 0.7524 | 0.8146 | 0.8767 |
|            | WorldMirror [24]  | 0.9893 | 0.8462 | 0.9807 | 0.9934 | 0.9965 | 0.5126 | 0.7345 | 0.8205 | 0.8646 | 0.9093 |
|            | Off The Grid [27] | 1.0000 | 0.9289 | 0.9917 | 0.9970 | 0.9985 | 0.6318 | 0.8089 | 0.8721 | 0.9040 | 0.9360 |

Table 10. Averaged depth estimation metrics. Sparse setup with 3, 6, 9 input views and Dense setup with 25 input views.

|            | Method            | AbsRel | SqRel  | RMSE   | RMSElog | SILogRMSE | $\delta < 1.25$ | $\delta < 1.25^2$ | $\delta < 1.25^3$ |
|------------|-------------------|--------|--------|--------|---------|-----------|-----------------|-------------------|-------------------|
| Sparse - 3 | VGGT [39]         | 0.1039 | 0.3684 | 1.8997 | 0.2773  | 26.9079   | 0.8669          | 0.9367            | 0.9654            |
|            | $\pi^3$ [41]      | 0.1014 | 0.4749 | 2.2969 | 0.1863  | 18.0257   | 0.8895          | 0.9652            | 0.9836            |
|            | AnySplat [12]     | 0.2101 | 0.6371 | 2.3229 | 0.3134  | 27.5580   | 0.7557          | 0.8723            | 0.9086            |
|            | WorldMirror [24]  | 0.2003 | 0.6260 | 2.4310 | 0.3029  | 27.3801   | 0.7565          | 0.8394            | 0.9093            |
|            | Off The Grid [27] | 0.1627 | 0.5214 | 2.2715 | 0.2775  | 25.0702   | 0.7674          | 0.8743            | 0.9155            |
| Sparse - 6 | VGGT [39]         | 0.0959 | 0.3103 | 1.7007 | 0.2281  | 22.1614   | 0.8679          | 0.9395            | 0.9716            |
|            | $\pi^3$ [41]      | 0.0896 | 0.3766 | 1.9560 | 0.1694  | 16.2794   | 0.9191          | 0.9644            | 0.9829            |
|            | AnySplat [12]     | 0.1721 | 0.5198 | 2.1811 | 0.2853  | 26.0772   | 0.7970          | 0.8847            | 0.9259            |
|            | WorldMirror [24]  | 0.1601 | 0.5658 | 2.3436 | 0.2739  | 25.0043   | 0.7873          | 0.8742            | 0.9259            |
|            | Off The Grid [27] | 0.1257 | 0.4359 | 2.0586 | 0.2402  | 21.9182   | 0.8203          | 0.8994            | 0.9297            |
| Sparse - 9 | VGGT [39]         | 0.0992 | 0.3245 | 1.7494 | 0.3024  | 29.1500   | 0.8681          | 0.9372            | 0.9684            |
|            | $\pi^3$ [41]      | 0.0909 | 0.4617 | 2.0434 | 0.1752  | 16.8395   | 0.9133          | 0.9633            | 0.9839            |
|            | AnySplat [12]     | 0.1981 | 0.6394 | 2.2879 | 0.3020  | 27.3566   | 0.7727          | 0.8739            | 0.9126            |
|            | WorldMirror [24]  | 0.1781 | 0.6133 | 2.3040 | 0.2759  | 25.0374   | 0.7904          | 0.8731            | 0.9215            |
|            | Off The Grid [27] | 0.1434 | 0.4698 | 2.1107 | 0.2471  | 22.6008   | 0.8083          | 0.8895            | 0.9218            |
| Dense      | VGGT [39]         | 0.1085 | 0.3812 | 1.9288 | 0.3197  | 30.7427   | 0.8499          | 0.9382            | 0.9705            |
|            | $\pi^3$ [41]      | 0.1344 | 1.3766 | 2.6546 | 0.2059  | 19.2137   | 0.8893          | 0.9547            | 0.9693            |
|            | AnySplat [12]     | 0.2248 | 1.0817 | 2.5529 | 0.3186  | 28.6486   | 0.7595          | 0.8741            | 0.9245            |
|            | WorldMirror [24]  | 0.1811 | 0.7195 | 2.5608 | 0.2836  | 25.2064   | 0.7632          | 0.8554            | 0.9262            |
|            | Off The Grid [27] | 0.1438 | 0.5316 | 2.2300 | 0.2427  | 21.6178   | 0.7959          | 0.8961            | 0.9412            |

Table 11. Averaged novel view synthesis metrics. Sparse setup with 3, 6, 9 input views and Dense setup with 25 input views.

|            | Method            | PSNR  | SSIM   | LPIPS  | MUSIQ | PSNR  | SSIM   | LPIPS  | MUSIQ |
|------------|-------------------|-------|--------|--------|-------|-------|--------|--------|-------|
| Sparse - 3 | AnySplat [12]     | 12.15 | 0.6723 | 0.6080 | 52.61 | 13.34 | 0.7065 | 0.5656 | 53.31 |
|            | WorldMirror [24]  | 17.54 | 0.7318 | 0.5648 | 40.20 | 20.94 | 0.7841 | 0.5110 | 41.54 |
|            | Off The Grid [27] | 16.84 | 0.7335 | 0.5833 | 54.31 | 19.08 | 0.7679 | 0.5474 | 51.38 |
| Sparse - 6 | AnySplat [12]     | 13.27 | 0.6972 | 0.5822 | 51.80 | 15.95 | 0.7359 | 0.5441 | 51.06 |
|            | WorldMirror [24]  | 18.97 | 0.7560 | 0.5472 | 39.52 | 21.86 | 0.7958 | 0.4997 | 39.36 |
|            | Off The Grid [27] | 17.00 | 0.7323 | 0.5668 | 53.75 | 20.83 | 0.7898 | 0.5166 | 49.95 |
| Sparse - 9 | AnySplat [12]     | 16.30 | 0.7345 | 0.5541 | 50.05 | 19.52 | 0.7755 | 0.5101 | 49.22 |
|            | WorldMirror [24]  | 19.57 | 0.7671 | 0.5436 | 37.16 | 22.84 | 0.8122 | 0.4956 | 36.56 |
|            | Off The Grid [27] | 18.24 | 0.7487 | 0.5477 | 51.46 | 22.69 | 0.8129 | 0.4893 | 47.57 |
| Dense      | AnySplat [12]     | 18.74 | 0.7440 | 0.5533 | 44.35 | 23.12 | 0.7943 | 0.4955 | 43.66 |
|            | WorldMirror [24]  | 20.10 | 0.7666 | 0.5475 | 32.18 | 24.44 | 0.8192 | 0.4962 | 32.33 |
|            | Off The Grid [27] | 20.08 | 0.7589 | 0.5310 | 44.76 | 25.16 | 0.8264 | 0.4728 | 41.40 |

Table 12. Detailed camera pose estimation metrics. Sparse setup with 3 and 6 input views.

| Scene             | Method            | RRA@5  | TRA@5  | TRA@10 | TRA@15 | TRA@20 | AUC@5  | AUC@10 | AUC@15 | AUC@20 | AUC@30 |
|-------------------|-------------------|--------|--------|--------|--------|--------|--------|--------|--------|--------|--------|
| <b>Sparse - 3</b> |                   |        |        |        |        |        |        |        |        |        |        |
| 010_0050          | VGGT [39]         | 1.0000 | 0.8125 | 1.0000 | 1.0000 | 1.0000 | 0.4306 | 0.7102 | 0.8060 | 0.8552 | 0.9032 |
|                   | $\pi^3$ [41]      | 0.7708 | 0.2917 | 1.0000 | 1.0000 | 1.0000 | 0.0625 | 0.4242 | 0.6133 | 0.7073 | 0.8071 |
|                   | AnySplat [12]     | 0.6458 | 0.9167 | 1.0000 | 1.0000 | 1.0000 | 0.1285 | 0.5568 | 0.7044 | 0.7758 | 0.8528 |
|                   | WorldMirror [24]  | 1.0000 | 0.7500 | 1.0000 | 1.0000 | 1.0000 | 0.4375 | 0.7159 | 0.8125 | 0.8581 | 0.9046 |
|                   | Off The Grid [27] | 1.0000 | 1.0000 | 1.0000 | 1.0000 | 1.0000 | 0.5451 | 0.7746 | 0.8490 | 0.8869 | 0.9247 |
| 020_0020          | VGGT [39]         | 1.0000 | 0.4792 | 1.0000 | 1.0000 | 1.0000 | 0.2187 | 0.5246 | 0.6901 | 0.7708 | 0.8481 |
|                   | $\pi^3$ [41]      | 1.0000 | 0.3958 | 0.9583 | 1.0000 | 1.0000 | 0.1215 | 0.4811 | 0.6523 | 0.7371 | 0.8239 |
|                   | AnySplat [12]     | 1.0000 | 0.7292 | 0.9583 | 1.0000 | 1.0000 | 0.3333 | 0.6326 | 0.7526 | 0.8135 | 0.8757 |
|                   | WorldMirror [24]  | 1.0000 | 0.4167 | 1.0000 | 1.0000 | 1.0000 | 0.3299 | 0.6345 | 0.7552 | 0.8175 | 0.8790 |
|                   | Off The Grid [27] | 1.0000 | 1.0000 | 1.0000 | 1.0000 | 1.0000 | 0.6875 | 0.8447 | 0.8945 | 0.9206 | 0.9469 |
| 040_0040          | VGGT [39]         | 1.0000 | 0.7000 | 0.9333 | 0.9833 | 1.0000 | 0.3889 | 0.6621 | 0.7656 | 0.8246 | 0.8833 |
|                   | $\pi^3$ [41]      | 1.0000 | 0.3500 | 1.0000 | 1.0000 | 1.0000 | 0.1722 | 0.4652 | 0.6438 | 0.7325 | 0.8215 |
|                   | AnySplat [12]     | 0.9333 | 0.7833 | 0.9833 | 1.0000 | 1.0000 | 0.3528 | 0.6288 | 0.7500 | 0.8143 | 0.8763 |
|                   | WorldMirror [24]  | 1.0000 | 0.5500 | 0.9333 | 1.0000 | 1.0000 | 0.2306 | 0.5212 | 0.6740 | 0.7579 | 0.8398 |
|                   | Off The Grid [27] | 1.0000 | 0.8000 | 0.9667 | 1.0000 | 1.0000 | 0.3861 | 0.6758 | 0.7833 | 0.8365 | 0.8914 |
| 050_0130          | VGGT [39]         | 1.0000 | 0.8000 | 1.0000 | 1.0000 | 1.0000 | 0.4500 | 0.7182 | 0.8062 | 0.8571 | 0.9054 |
|                   | $\pi^3$ [41]      | 1.0000 | 0.6333 | 1.0000 | 1.0000 | 1.0000 | 0.3444 | 0.6000 | 0.7333 | 0.8048 | 0.8688 |
|                   | AnySplat [12]     | 0.3333 | 0.6000 | 0.9667 | 1.0000 | 1.0000 | 0.0389 | 0.4091 | 0.6062 | 0.7079 | 0.8065 |
|                   | WorldMirror [24]  | 1.0000 | 0.6333 | 0.9000 | 1.0000 | 1.0000 | 0.3000 | 0.5879 | 0.7167 | 0.7873 | 0.8570 |
|                   | Off The Grid [27] | 1.0000 | 1.0000 | 1.0000 | 1.0000 | 1.0000 | 0.5778 | 0.7909 | 0.8688 | 0.9016 | 0.9344 |
| 050_0160          | VGGT [39]         | 1.0000 | 0.5833 | 0.9722 | 1.0000 | 1.0000 | 0.3056 | 0.6162 | 0.7500 | 0.8135 | 0.8746 |
|                   | $\pi^3$ [41]      | 1.0000 | 0.6667 | 1.0000 | 1.0000 | 1.0000 | 0.4120 | 0.6641 | 0.7760 | 0.8333 | 0.8898 |
|                   | AnySplat [12]     | 1.0000 | 1.0000 | 1.0000 | 1.0000 | 1.0000 | 0.4352 | 0.7172 | 0.8194 | 0.8638 | 0.9095 |
|                   | WorldMirror [24]  | 1.0000 | 0.5556 | 0.9722 | 1.0000 | 1.0000 | 0.3426 | 0.6086 | 0.7344 | 0.8016 | 0.8674 |
|                   | Off The Grid [27] | 1.0000 | 0.7500 | 1.0000 | 1.0000 | 1.0000 | 0.3657 | 0.6465 | 0.7656 | 0.8254 | 0.8844 |
| 060_0100          | VGGT [39]         | 1.0000 | 0.9444 | 1.0000 | 1.0000 | 1.0000 | 0.5093 | 0.7551 | 0.8351 | 0.8757 | 0.9176 |
|                   | $\pi^3$ [41]      | 1.0000 | 0.6667 | 1.0000 | 1.0000 | 1.0000 | 0.2593 | 0.5934 | 0.7326 | 0.8003 | 0.8665 |
|                   | AnySplat [12]     | 1.0000 | 0.8889 | 1.0000 | 1.0000 | 1.0000 | 0.5370 | 0.7778 | 0.8542 | 0.8929 | 0.9274 |
|                   | WorldMirror [24]  | 1.0000 | 1.0000 | 1.0000 | 1.0000 | 1.0000 | 0.7269 | 0.8712 | 0.9132 | 0.9352 | 0.9561 |
|                   | Off The Grid [27] | 1.0000 | 0.9722 | 1.0000 | 1.0000 | 1.0000 | 0.5926 | 0.7879 | 0.8576 | 0.8942 | 0.9301 |
| 060_0130          | VGGT [39]         | 1.0000 | 0.6667 | 0.9583 | 1.0000 | 1.0000 | 0.3646 | 0.6383 | 0.7591 | 0.8214 | 0.8797 |
|                   | $\pi^3$ [41]      | 1.0000 | 0.4583 | 0.7500 | 0.9792 | 1.0000 | 0.2118 | 0.4223 | 0.5859 | 0.6905 | 0.7910 |
|                   | AnySplat [12]     | 0.9583 | 0.6875 | 0.9792 | 1.0000 | 1.0000 | 0.2049 | 0.5587 | 0.7031 | 0.7768 | 0.8542 |
|                   | WorldMirror [24]  | 1.0000 | 0.7500 | 1.0000 | 1.0000 | 1.0000 | 0.4306 | 0.6610 | 0.7708 | 0.8294 | 0.8871 |
|                   | Off The Grid [27] | 1.0000 | 0.8542 | 1.0000 | 1.0000 | 1.0000 | 0.5625 | 0.7803 | 0.8529 | 0.8919 | 0.9281 |
| 070_0123          | VGGT [39]         | 1.0000 | 0.3667 | 0.9333 | 1.0000 | 1.0000 | 0.1833 | 0.5030 | 0.6625 | 0.7476 | 0.8333 |
|                   | $\pi^3$ [41]      | 0.5000 | 0.0000 | 0.5667 | 0.7333 | 0.8000 | 0.0000 | 0.1879 | 0.3479 | 0.4524 | 0.6075 |
|                   | AnySplat [12]     | 1.0000 | 0.7667 | 1.0000 | 1.0000 | 1.0000 | 0.1889 | 0.5697 | 0.7104 | 0.7857 | 0.8570 |
|                   | WorldMirror [24]  | 1.0000 | 0.0333 | 0.2000 | 0.7000 | 0.9333 | 0.0111 | 0.0515 | 0.2229 | 0.3794 | 0.5839 |
|                   | Off The Grid [27] | 1.0000 | 1.0000 | 1.0000 | 1.0000 | 1.0000 | 0.6722 | 0.8333 | 0.8937 | 0.9222 | 0.9473 |



Table 13. Detailed camera pose estimation metrics. Sparse setup with 6 input views.

| Scene             | Method            | RRA@5  | TRA@5  | TRA@10 | TRA@15 | TRA@20 | AUC@5  | AUC@10 | AUC@15 | AUC@20 | AUC@30 |
|-------------------|-------------------|--------|--------|--------|--------|--------|--------|--------|--------|--------|--------|
| <b>Sparse - 6</b> |                   |        |        |        |        |        |        |        |        |        |        |
| 010_0050          | VGGT [39]         | 1.0000 | 0.9958 | 1.0000 | 1.0000 | 1.0000 | 0.6208 | 0.8144 | 0.8755 | 0.9079 | 0.9384 |
|                   | $\pi^3$ [41]      | 1.0000 | 0.8792 | 1.0000 | 1.0000 | 1.0000 | 0.3444 | 0.6780 | 0.7862 | 0.8399 | 0.8922 |
|                   | AnySplat [12]     | 0.9833 | 0.9208 | 1.0000 | 1.0000 | 1.0000 | 0.3729 | 0.6890 | 0.7938 | 0.8458 | 0.8983 |
|                   | WorldMirror [24]  | 1.0000 | 0.9958 | 1.0000 | 1.0000 | 1.0000 | 0.7646 | 0.8879 | 0.9273 | 0.9460 | 0.9638 |
|                   | Off The Grid [27] | 1.0000 | 1.0000 | 1.0000 | 1.0000 | 1.0000 | 0.7049 | 0.8595 | 0.9065 | 0.9310 | 0.9542 |
| 020_0020          | VGGT [39]         | 1.0000 | 0.6208 | 0.9250 | 1.0000 | 1.0000 | 0.4076 | 0.6140 | 0.7385 | 0.8038 | 0.8690 |
|                   | $\pi^3$ [41]      | 1.0000 | 0.2917 | 0.6792 | 0.9958 | 1.0000 | 0.1312 | 0.3163 | 0.5245 | 0.6438 | 0.7620 |
|                   | AnySplat [12]     | 1.0000 | 0.5875 | 0.9792 | 1.0000 | 1.0000 | 0.2674 | 0.5663 | 0.7135 | 0.7865 | 0.8578 |
|                   | WorldMirror [24]  | 1.0000 | 0.8667 | 1.0000 | 1.0000 | 1.0000 | 0.4514 | 0.7277 | 0.8188 | 0.8631 | 0.9095 |
|                   | Off The Grid [27] | 1.0000 | 0.7667 | 0.9750 | 1.0000 | 1.0000 | 0.4757 | 0.6996 | 0.7997 | 0.8506 | 0.9012 |
| 040_0040          | VGGT [39]         | 1.0000 | 0.8700 | 0.9633 | 0.9933 | 1.0000 | 0.6278 | 0.7861 | 0.8527 | 0.8900 | 0.9271 |
|                   | $\pi^3$ [41]      | 1.0000 | 0.7200 | 0.9900 | 1.0000 | 1.0000 | 0.3533 | 0.6524 | 0.7683 | 0.8275 | 0.8868 |
|                   | AnySplat [12]     | 0.9667 | 0.8967 | 0.9800 | 1.0000 | 1.0000 | 0.4111 | 0.6845 | 0.7896 | 0.8425 | 0.8944 |
|                   | WorldMirror [24]  | 1.0000 | 0.8233 | 0.9800 | 0.9967 | 1.0000 | 0.4317 | 0.6955 | 0.7952 | 0.8463 | 0.8978 |
|                   | Off The Grid [27] | 1.0000 | 0.9167 | 0.9667 | 0.9900 | 1.0000 | 0.5889 | 0.7767 | 0.8465 | 0.8843 | 0.9224 |
| 050_0130          | VGGT [39]         | 1.0000 | 0.6933 | 0.9867 | 1.0000 | 1.0000 | 0.4022 | 0.6509 | 0.7692 | 0.8270 | 0.8841 |
|                   | $\pi^3$ [41]      | 1.0000 | 0.7067 | 0.9667 | 1.0000 | 1.0000 | 0.3756 | 0.6412 | 0.7575 | 0.8181 | 0.8787 |
|                   | AnySplat [12]     | 0.8067 | 0.5600 | 0.8800 | 0.9733 | 1.0000 | 0.1556 | 0.4576 | 0.6154 | 0.7095 | 0.8071 |
|                   | WorldMirror [24]  | 1.0000 | 0.6467 | 0.9400 | 1.0000 | 1.0000 | 0.3700 | 0.6145 | 0.7412 | 0.8063 | 0.8714 |
|                   | Off The Grid [27] | 1.0000 | 0.9867 | 1.0000 | 1.0000 | 1.0000 | 0.6933 | 0.8497 | 0.9000 | 0.9267 | 0.9518 |
| 050_0160          | VGGT [39]         | 1.0000 | 0.5333 | 0.9778 | 1.0000 | 1.0000 | 0.2685 | 0.5727 | 0.7139 | 0.7865 | 0.8573 |
|                   | $\pi^3$ [41]      | 1.0000 | 0.6333 | 0.9722 | 1.0000 | 1.0000 | 0.3139 | 0.6141 | 0.7451 | 0.8103 | 0.8735 |
|                   | AnySplat [12]     | 1.0000 | 0.7722 | 1.0000 | 1.0000 | 1.0000 | 0.4333 | 0.7005 | 0.8038 | 0.8521 | 0.9011 |
|                   | WorldMirror [24]  | 1.0000 | 0.5000 | 0.9611 | 0.9944 | 1.0000 | 0.2741 | 0.5414 | 0.6889 | 0.7680 | 0.8457 |
|                   | Off The Grid [27] | 1.0000 | 0.5500 | 1.0000 | 1.0000 | 1.0000 | 0.2926 | 0.5949 | 0.7316 | 0.7981 | 0.8667 |
| 060_0100          | VGGT [39]         | 1.0000 | 0.9167 | 1.0000 | 1.0000 | 1.0000 | 0.6296 | 0.8162 | 0.8788 | 0.9095 | 0.9401 |
|                   | $\pi^3$ [41]      | 1.0000 | 0.7278 | 1.0000 | 1.0000 | 1.0000 | 0.3463 | 0.6495 | 0.7670 | 0.8265 | 0.8851 |
|                   | AnySplat [12]     | 1.0000 | 0.9444 | 1.0000 | 1.0000 | 1.0000 | 0.5222 | 0.7586 | 0.8392 | 0.8796 | 0.9203 |
|                   | WorldMirror [24]  | 1.0000 | 0.9500 | 1.0000 | 1.0000 | 1.0000 | 0.6685 | 0.8298 | 0.8868 | 0.9156 | 0.9443 |
|                   | Off The Grid [27] | 1.0000 | 0.9833 | 1.0000 | 1.0000 | 1.0000 | 0.7139 | 0.8596 | 0.9090 | 0.9312 | 0.9536 |
| 060_0130          | VGGT [39]         | 1.0000 | 0.7958 | 0.9792 | 0.9958 | 1.0000 | 0.4611 | 0.6989 | 0.7977 | 0.8478 | 0.8992 |
|                   | $\pi^3$ [41]      | 1.0000 | 0.5042 | 0.9708 | 1.0000 | 1.0000 | 0.2382 | 0.5485 | 0.6979 | 0.7736 | 0.8495 |
|                   | AnySplat [12]     | 1.0000 | 0.8250 | 1.0000 | 1.0000 | 1.0000 | 0.3556 | 0.6720 | 0.7826 | 0.8377 | 0.8915 |
|                   | WorldMirror [24]  | 1.0000 | 0.9000 | 0.9875 | 1.0000 | 1.0000 | 0.5479 | 0.7652 | 0.8406 | 0.8806 | 0.9208 |
|                   | Off The Grid [27] | 1.0000 | 0.9208 | 1.0000 | 1.0000 | 1.0000 | 0.5625 | 0.7777 | 0.8526 | 0.8899 | 0.9277 |
| 070_0123          | VGGT [39]         | 1.0000 | 0.7933 | 0.9933 | 1.0000 | 1.0000 | 0.4911 | 0.7200 | 0.8112 | 0.8581 | 0.9052 |
|                   | $\pi^3$ [41]      | 0.9933 | 0.5267 | 0.9267 | 0.9933 | 1.0000 | 0.1689 | 0.4836 | 0.6492 | 0.7378 | 0.8243 |
|                   | AnySplat [12]     | 1.0000 | 0.9467 | 1.0000 | 1.0000 | 1.0000 | 0.4833 | 0.7448 | 0.8308 | 0.8752 | 0.9181 |
|                   | WorldMirror [24]  | 1.0000 | 0.7467 | 0.9467 | 0.9933 | 1.0000 | 0.4678 | 0.6842 | 0.7821 | 0.8365 | 0.8916 |
|                   | Off The Grid [27] | 1.0000 | 1.0000 | 1.0000 | 1.0000 | 1.0000 | 0.7478 | 0.8812 | 0.9208 | 0.9410 | 0.9613 |

Table 14. Detailed camera pose estimation metrics. Sparse setup with 9 input views.

| Scene             | Method            | RRA@5  | TRA@5  | TRA@10 | TRA@15 | TRA@20 | AUC@5  | AUC@10 | AUC@15 | AUC@20 | AUC@30 |
|-------------------|-------------------|--------|--------|--------|--------|--------|--------|--------|--------|--------|--------|
| <b>Sparse - 9</b> |                   |        |        |        |        |        |        |        |        |        |        |
| 010_0050          | VGGT [39]         | 1.0000 | 0.9948 | 1.0000 | 1.0000 | 1.0000 | 0.6846 | 0.8475 | 0.8988 | 0.9248 | 0.9502 |
|                   | $\pi^3$ [41]      | 1.0000 | 0.6753 | 0.9601 | 1.0000 | 1.0000 | 0.2827 | 0.6064 | 0.7348 | 0.8016 | 0.8683 |
|                   | AnySplat [12]     | 0.9792 | 0.9236 | 1.0000 | 1.0000 | 1.0000 | 0.4010 | 0.6998 | 0.8000 | 0.8504 | 0.9005 |
|                   | WorldMirror [24]  | 1.0000 | 0.9861 | 1.0000 | 1.0000 | 1.0000 | 0.7046 | 0.8570 | 0.9055 | 0.9289 | 0.9531 |
|                   | Off The Grid [27] | 1.0000 | 0.9983 | 1.0000 | 1.0000 | 1.0000 | 0.6797 | 0.8431 | 0.8957 | 0.9225 | 0.9487 |
| 020_0020          | VGGT [39]         | 1.0000 | 0.5747 | 0.8819 | 0.9896 | 1.0000 | 0.3440 | 0.5598 | 0.6947 | 0.7715 | 0.8483 |
|                   | $\pi^3$ [41]      | 1.0000 | 0.4201 | 0.9635 | 1.0000 | 1.0000 | 0.1580 | 0.4754 | 0.6478 | 0.7354 | 0.8242 |
|                   | AnySplat [12]     | 1.0000 | 0.5278 | 0.9792 | 1.0000 | 1.0000 | 0.2208 | 0.5275 | 0.6858 | 0.7645 | 0.8435 |
|                   | WorldMirror [24]  | 1.0000 | 0.7882 | 0.9983 | 1.0000 | 1.0000 | 0.3819 | 0.6709 | 0.7802 | 0.8350 | 0.8905 |
|                   | Off The Grid [27] | 1.0000 | 0.7083 | 0.9010 | 0.9792 | 1.0000 | 0.4514 | 0.6553 | 0.7524 | 0.8135 | 0.8766 |
| 040_0040          | VGGT [39]         | 1.0000 | 0.9111 | 0.9833 | 0.9972 | 1.0000 | 0.6069 | 0.7933 | 0.8612 | 0.8964 | 0.9313 |
|                   | $\pi^3$ [41]      | 1.0000 | 0.4958 | 0.9500 | 1.0000 | 1.0000 | 0.2285 | 0.5279 | 0.6849 | 0.7638 | 0.8424 |
|                   | AnySplat [12]     | 0.9667 | 0.9097 | 0.9806 | 0.9958 | 1.0000 | 0.4197 | 0.6937 | 0.7947 | 0.8458 | 0.8978 |
|                   | WorldMirror [24]  | 1.0000 | 0.8236 | 0.9681 | 0.9861 | 0.9931 | 0.4338 | 0.6898 | 0.7859 | 0.8379 | 0.8909 |
|                   | Off The Grid [27] | 1.0000 | 0.9347 | 0.9847 | 0.9972 | 0.9986 | 0.6227 | 0.7999 | 0.8659 | 0.9012 | 0.9343 |
| 050_0130          | VGGT [39]         | 1.0000 | 0.6611 | 0.9278 | 0.9944 | 1.0000 | 0.3523 | 0.5970 | 0.7233 | 0.7910 | 0.8610 |
|                   | $\pi^3$ [41]      | 1.0000 | 0.7972 | 0.9778 | 1.0000 | 1.0000 | 0.4384 | 0.6939 | 0.7927 | 0.8458 | 0.8975 |
|                   | AnySplat [12]     | 0.8111 | 0.5278 | 0.8500 | 0.9611 | 1.0000 | 0.1486 | 0.4371 | 0.6028 | 0.6997 | 0.8003 |
|                   | WorldMirror [24]  | 1.0000 | 0.4306 | 0.8750 | 0.9833 | 1.0000 | 0.2194 | 0.4684 | 0.6321 | 0.7238 | 0.8166 |
|                   | Off The Grid [27] | 1.0000 | 0.9833 | 1.0000 | 1.0000 | 1.0000 | 0.6968 | 0.8515 | 0.9007 | 0.9258 | 0.9505 |
| 050_0160          | VGGT [39]         | 1.0000 | 0.8588 | 1.0000 | 1.0000 | 1.0000 | 0.4734 | 0.7355 | 0.8245 | 0.8688 | 0.9129 |
|                   | $\pi^3$ [41]      | 1.0000 | 0.7546 | 0.9931 | 1.0000 | 1.0000 | 0.4016 | 0.6755 | 0.7857 | 0.8403 | 0.8932 |
|                   | AnySplat [12]     | 1.0000 | 0.8079 | 0.9838 | 1.0000 | 1.0000 | 0.4140 | 0.6791 | 0.7852 | 0.8398 | 0.8934 |
|                   | WorldMirror [24]  | 1.0000 | 0.6852 | 0.9931 | 1.0000 | 1.0000 | 0.3839 | 0.6543 | 0.7717 | 0.8300 | 0.8866 |
|                   | Off The Grid [27] | 1.0000 | 0.7315 | 1.0000 | 1.0000 | 1.0000 | 0.3661 | 0.6763 | 0.7836 | 0.8390 | 0.8924 |
| 060_0100          | VGGT [39]         | 1.0000 | 0.9630 | 1.0000 | 1.0000 | 1.0000 | 0.6701 | 0.8388 | 0.8931 | 0.9204 | 0.9474 |
|                   | $\pi^3$ [41]      | 1.0000 | 0.8819 | 1.0000 | 1.0000 | 1.0000 | 0.4541 | 0.7233 | 0.8167 | 0.8627 | 0.9084 |
|                   | AnySplat [12]     | 1.0000 | 0.9329 | 1.0000 | 1.0000 | 1.0000 | 0.5312 | 0.7622 | 0.8430 | 0.8817 | 0.9209 |
|                   | WorldMirror [24]  | 1.0000 | 0.9583 | 1.0000 | 1.0000 | 1.0000 | 0.7018 | 0.8500 | 0.9013 | 0.9266 | 0.9511 |
|                   | Off The Grid [27] | 1.0000 | 0.9977 | 1.0000 | 1.0000 | 1.0000 | 0.7380 | 0.8742 | 0.9165 | 0.9377 | 0.9590 |
| 060_0130          | VGGT [39]         | 1.0000 | 0.9028 | 0.9861 | 0.9983 | 1.0000 | 0.5764 | 0.7748 | 0.8496 | 0.8872 | 0.9250 |
|                   | $\pi^3$ [41]      | 1.0000 | 0.5451 | 0.9479 | 0.9983 | 1.0000 | 0.2815 | 0.5671 | 0.7074 | 0.7811 | 0.8540 |
|                   | AnySplat [12]     | 0.9896 | 0.7986 | 0.9948 | 1.0000 | 1.0000 | 0.3484 | 0.6501 | 0.7681 | 0.8266 | 0.8849 |
|                   | WorldMirror [24]  | 1.0000 | 0.8993 | 0.9948 | 1.0000 | 1.0000 | 0.5694 | 0.7732 | 0.8500 | 0.8876 | 0.9249 |
|                   | Off The Grid [27] | 1.0000 | 0.9531 | 0.9983 | 1.0000 | 1.0000 | 0.6400 | 0.8174 | 0.8791 | 0.9095 | 0.9399 |
| 070_0123          | VGGT [39]         | 1.0000 | 0.5750 | 0.9889 | 1.0000 | 1.0000 | 0.3046 | 0.5869 | 0.7252 | 0.7946 | 0.8634 |
|                   | $\pi^3$ [41]      | 1.0000 | 0.3778 | 0.8917 | 1.0000 | 1.0000 | 0.1546 | 0.4346 | 0.6160 | 0.7134 | 0.8091 |
|                   | AnySplat [12]     | 1.0000 | 0.9083 | 1.0000 | 1.0000 | 1.0000 | 0.5042 | 0.7528 | 0.8349 | 0.8769 | 0.9183 |
|                   | WorldMirror [24]  | 1.0000 | 0.7500 | 0.9278 | 0.9694 | 1.0000 | 0.4704 | 0.6702 | 0.7655 | 0.8221 | 0.8832 |
|                   | Off The Grid [27] | 1.0000 | 0.9944 | 1.0000 | 1.0000 | 1.0000 | 0.6949 | 0.8520 | 0.9031 | 0.9278 | 0.9516 |

Table 15. Detailed camera pose estimation metrics. Dense setup with 25 input views.

| Scene        | Method            | RRA@5  | TRA@5  | TRA@10 | TRA@15 | TRA@20 | AUC@5  | AUC@10 | AUC@15 | AUC@20 | AUC@30 |
|--------------|-------------------|--------|--------|--------|--------|--------|--------|--------|--------|--------|--------|
| <b>Dense</b> |                   |        |        |        |        |        |        |        |        |        |        |
| 010_0050     | VGGT [39]         | 1.0000 | 0.9873 | 1.0000 | 1.0000 | 1.0000 | 0.7061 | 0.8571 | 0.9057 | 0.9294 | 0.9531 |
|              | $\pi^3$ [41]      | 1.0000 | 0.9608 | 0.9981 | 1.0000 | 1.0000 | 0.5812 | 0.7915 | 0.8620 | 0.8966 | 0.9313 |
|              | AnySplat [12]     | 0.9967 | 0.7046 | 0.9913 | 1.0000 | 1.0000 | 0.3165 | 0.6206 | 0.7478 | 0.8114 | 0.8746 |
|              | WorldMirror [24]  | 1.0000 | 0.9535 | 0.9985 | 1.0000 | 1.0000 | 0.6329 | 0.8154 | 0.8778 | 0.9087 | 0.9394 |
|              | Off The Grid [27] | 1.0000 | 0.9971 | 1.0000 | 1.0000 | 1.0000 | 0.7284 | 0.8669 | 0.9122 | 0.9346 | 0.9566 |
| 020_0020     | VGGT [39]         | 1.0000 | 0.7160 | 0.9813 | 0.9985 | 1.0000 | 0.3794 | 0.6558 | 0.7694 | 0.8273 | 0.8852 |
|              | $\pi^3$ [41]      | 1.0000 | 0.5521 | 0.9535 | 0.9983 | 1.0000 | 0.2480 | 0.5410 | 0.6911 | 0.7684 | 0.8459 |
|              | AnySplat [12]     | 0.9977 | 0.5744 | 0.9894 | 0.9998 | 1.0000 | 0.2395 | 0.5631 | 0.7089 | 0.7823 | 0.8553 |
|              | WorldMirror [24]  | 1.0000 | 0.7008 | 0.9769 | 0.9988 | 1.0000 | 0.3546 | 0.6352 | 0.7552 | 0.8167 | 0.8779 |
|              | Off The Grid [27] | 1.0000 | 0.7260 | 0.9923 | 1.0000 | 1.0000 | 0.3994 | 0.6723 | 0.7826 | 0.8376 | 0.8919 |
| 040_0040     | VGGT [39]         | 1.0000 | 0.8553 | 0.9632 | 0.9903 | 0.9965 | 0.5630 | 0.7490 | 0.8279 | 0.8699 | 0.9131 |
|              | $\pi^3$ [41]      | 1.0000 | 0.4675 | 0.8628 | 0.9663 | 0.9875 | 0.2158 | 0.4826 | 0.6347 | 0.7216 | 0.8127 |
|              | AnySplat [12]     | 0.9990 | 0.8478 | 0.9873 | 0.9965 | 0.9990 | 0.4191 | 0.6924 | 0.7931 | 0.8446 | 0.8965 |
|              | WorldMirror [24]  | 1.0000 | 0.8805 | 0.9505 | 0.9697 | 0.9803 | 0.5322 | 0.7355 | 0.8124 | 0.8537 | 0.8991 |
|              | Off The Grid [27] | 1.0000 | 0.9010 | 0.9603 | 0.9832 | 0.9915 | 0.6441 | 0.7964 | 0.8568 | 0.8901 | 0.9259 |
| 050_0130     | VGGT [39]         | 1.0000 | 0.8960 | 0.9913 | 0.9990 | 0.9997 | 0.4799 | 0.7303 | 0.8203 | 0.8651 | 0.9104 |
|              | $\pi^3$ [41]      | 1.0000 | 0.5760 | 0.8997 | 0.9727 | 0.9887 | 0.2874 | 0.5485 | 0.6840 | 0.7592 | 0.8383 |
|              | AnySplat [12]     | 0.7940 | 0.5943 | 0.9393 | 0.9970 | 1.0000 | 0.1691 | 0.5011 | 0.6632 | 0.7474 | 0.8319 |
|              | WorldMirror [24]  | 1.0000 | 0.6887 | 0.9690 | 0.9957 | 1.0000 | 0.3464 | 0.6278 | 0.7486 | 0.8116 | 0.8748 |
|              | Off The Grid [27] | 1.0000 | 0.9607 | 1.0000 | 1.0000 | 1.0000 | 0.5794 | 0.7920 | 0.8622 | 0.8968 | 0.9313 |
| 050_0160     | VGGT [39]         | 1.0000 | 0.9875 | 1.0000 | 1.0000 | 1.0000 | 0.7493 | 0.8785 | 0.9199 | 0.9404 | 0.9605 |
|              | $\pi^3$ [41]      | 1.0000 | 0.9683 | 0.9989 | 1.0000 | 1.0000 | 0.7033 | 0.8538 | 0.9037 | 0.9282 | 0.9522 |
|              | AnySplat [12]     | 1.0000 | 0.9714 | 1.0000 | 1.0000 | 1.0000 | 0.5034 | 0.7537 | 0.8369 | 0.8781 | 0.9191 |
|              | WorldMirror [24]  | 1.0000 | 0.9881 | 0.9997 | 1.0000 | 1.0000 | 0.7733 | 0.8891 | 0.9270 | 0.9458 | 0.9641 |
|              | Off The Grid [27] | 1.0000 | 0.9917 | 1.0000 | 1.0000 | 1.0000 | 0.7680 | 0.8881 | 0.9263 | 0.9451 | 0.9638 |
| 060_0100     | VGGT [39]         | 1.0000 | 0.9683 | 0.9983 | 1.0000 | 1.0000 | 0.6930 | 0.8469 | 0.8989 | 0.9246 | 0.9500 |
|              | $\pi^3$ [41]      | 1.0000 | 0.9358 | 0.9981 | 0.9997 | 1.0000 | 0.5195 | 0.7591 | 0.8402 | 0.8804 | 0.9204 |
|              | AnySplat [12]     | 1.0000 | 0.8825 | 0.9894 | 0.9975 | 0.9997 | 0.4419 | 0.7081 | 0.8044 | 0.8538 | 0.9032 |
|              | WorldMirror [24]  | 1.0000 | 0.9708 | 0.9986 | 0.9997 | 1.0000 | 0.6819 | 0.8413 | 0.8952 | 0.9219 | 0.9481 |
|              | Off The Grid [27] | 1.0000 | 0.9817 | 0.9994 | 1.0000 | 1.0000 | 0.7500 | 0.8777 | 0.9197 | 0.9402 | 0.9603 |
| 060_0130     | VGGT [39]         | 1.0000 | 0.6867 | 0.9381 | 0.9850 | 0.9981 | 0.3730 | 0.6237 | 0.7411 | 0.8045 | 0.8698 |
|              | $\pi^3$ [41]      | 1.0000 | 0.9058 | 0.9954 | 0.9996 | 1.0000 | 0.5311 | 0.7597 | 0.8401 | 0.8804 | 0.9204 |
|              | AnySplat [12]     | 0.9700 | 0.6283 | 0.9788 | 0.9994 | 1.0000 | 0.2752 | 0.5785 | 0.7187 | 0.7894 | 0.8599 |
|              | WorldMirror [24]  | 1.0000 | 0.8475 | 0.9927 | 0.9988 | 1.0000 | 0.4823 | 0.7290 | 0.8198 | 0.8651 | 0.9102 |
|              | Off The Grid [27] | 1.0000 | 0.9827 | 0.9998 | 1.0000 | 1.0000 | 0.6458 | 0.8249 | 0.8845 | 0.9137 | 0.9428 |
| 070_0123     | VGGT [39]         | 0.9977 | 0.2390 | 0.6043 | 0.8790 | 0.9723 | 0.0968 | 0.2804 | 0.4477 | 0.5733 | 0.7131 |
|              | $\pi^3$ [41]      | 0.9807 | 0.5927 | 0.9350 | 0.9880 | 0.9980 | 0.1970 | 0.5248 | 0.6746 | 0.7550 | 0.8367 |
|              | AnySplat [12]     | 0.9973 | 0.6470 | 0.9670 | 0.9960 | 1.0000 | 0.2903 | 0.5939 | 0.7273 | 0.7954 | 0.8638 |
|              | WorldMirror [24]  | 0.8800 | 0.6743 | 0.9663 | 0.9953 | 0.9997 | 0.2325 | 0.5633 | 0.7054 | 0.7792 | 0.8529 |
|              | Off The Grid [27] | 1.0000 | 0.9437 | 0.9997 | 1.0000 | 1.0000 | 0.5494 | 0.7737 | 0.8499 | 0.8878 | 0.9255 |

Table 16. Detailed depth estimation metrics. Sparse setup with 3 and 6 input views.

| Scene             | Method            | AbsRel | SqRel  | RMSE   | RMSElog | SILogRMSE | $\delta < 1.25$ | $\delta < 1.25^2$ | $\delta < 1.25^3$ |
|-------------------|-------------------|--------|--------|--------|---------|-----------|-----------------|-------------------|-------------------|
| <b>Sparse - 3</b> |                   |        |        |        |         |           |                 |                   |                   |
| 010_0050          | VGGT [39]         | 0.0506 | 0.0408 | 0.4206 | 0.1128  | 11.2481   | 0.9675          | 0.9868            | 0.9932            |
|                   | $\pi^3$ [41]      | 0.1168 | 0.1305 | 0.7949 | 0.1700  | 16.6503   | 0.8605          | 0.9848            | 0.9904            |
|                   | AnySplat [12]     | 0.1270 | 0.1295 | 0.7714 | 0.1996  | 18.0449   | 0.8133          | 0.9644            | 0.9828            |
|                   | WorldMirror [24]  | 0.1146 | 0.1027 | 0.6224 | 0.1708  | 14.9563   | 0.8522          | 0.9828            | 0.9899            |
|                   | Off The Grid [27] | 0.0988 | 0.0853 | 0.5646 | 0.1584  | 14.2080   | 0.8753          | 0.9847            | 0.9923            |
| 020_0020          | VGGT [39]         | 0.0706 | 0.7683 | 3.9387 | 0.1432  | 14.1978   | 0.9300          | 0.9719            | 0.9922            |
|                   | $\pi^3$ [41]      | 0.0564 | 1.3387 | 5.9156 | 0.1306  | 12.9372   | 0.9512          | 0.9801            | 0.9864            |
|                   | AnySplat [12]     | 0.0676 | 0.4227 | 3.6286 | 0.1516  | 15.0502   | 0.9348          | 0.9614            | 0.9855            |
|                   | WorldMirror [24]  | 0.0784 | 0.6077 | 4.3820 | 0.1886  | 18.5157   | 0.9406          | 0.9567            | 0.9624            |
|                   | Off The Grid [27] | 0.0589 | 0.4068 | 3.5373 | 0.1409  | 13.9320   | 0.9440          | 0.9605            | 0.9855            |
| 040_0040          | VGGT [39]         | 0.1908 | 0.3523 | 1.6721 | 0.7185  | 69.8145   | 0.7057          | 0.8707            | 0.9262            |
|                   | $\pi^3$ [41]      | 0.1498 | 0.5694 | 2.3643 | 0.2486  | 23.7811   | 0.8159          | 0.9552            | 0.9863            |
|                   | AnySplat [12]     | 0.5933 | 1.5028 | 2.7454 | 0.5829  | 47.6059   | 0.3936          | 0.6422            | 0.7358            |
|                   | WorldMirror [24]  | 0.5626 | 1.3127 | 2.7923 | 0.5983  | 52.8913   | 0.3901          | 0.5232            | 0.7450            |
|                   | Off The Grid [27] | 0.4254 | 0.9450 | 2.6686 | 0.5002  | 44.8532   | 0.3885          | 0.6570            | 0.7759            |
| 050_0130          | VGGT [39]         | 0.1824 | 0.6250 | 1.9970 | 0.3071  | 28.8145   | 0.7697          | 0.8569            | 0.9083            |
|                   | $\pi^3$ [41]      | 0.0934 | 0.1831 | 1.2670 | 0.1726  | 16.5690   | 0.9367          | 0.9793            | 0.9874            |
|                   | AnySplat [12]     | 0.1593 | 0.3428 | 1.6874 | 0.2421  | 23.0157   | 0.7371          | 0.9407            | 0.9774            |
|                   | WorldMirror [24]  | 0.2526 | 0.7391 | 2.2962 | 0.3247  | 30.7239   | 0.5970          | 0.8049            | 0.9481            |
|                   | Off The Grid [27] | 0.1792 | 0.4202 | 1.7929 | 0.2662  | 25.1624   | 0.6805          | 0.8988            | 0.9524            |
| 050_0160          | VGGT [39]         | 0.0773 | 0.5323 | 2.5893 | 0.1913  | 18.1662   | 0.9030          | 0.9345            | 0.9635            |
|                   | $\pi^3$ [41]      | 0.0732 | 0.5141 | 2.5462 | 0.1738  | 16.0382   | 0.9176          | 0.9550            | 0.9660            |
|                   | AnySplat [12]     | 0.0902 | 0.5728 | 2.6970 | 0.2038  | 19.1658   | 0.8925          | 0.9492            | 0.9654            |
|                   | WorldMirror [24]  | 0.1086 | 0.6478 | 2.8034 | 0.2269  | 21.1764   | 0.8620          | 0.9303            | 0.9656            |
|                   | Off The Grid [27] | 0.0874 | 0.6093 | 2.7599 | 0.1989  | 18.2768   | 0.8868          | 0.9500            | 0.9671            |
| 060_0100          | VGGT [39]         | 0.0646 | 0.3727 | 2.4009 | 0.1916  | 18.3143   | 0.9099          | 0.9394            | 0.9686            |
|                   | $\pi^3$ [41]      | 0.0636 | 0.2441 | 1.9755 | 0.1531  | 15.0738   | 0.9396          | 0.9678            | 0.9835            |
|                   | AnySplat [12]     | 0.1074 | 0.3549 | 2.3227 | 0.2023  | 19.6165   | 0.8887          | 0.9482            | 0.9778            |
|                   | WorldMirror [24]  | 0.0613 | 0.3568 | 2.3975 | 0.1877  | 17.9454   | 0.9089          | 0.9408            | 0.9736            |
|                   | Off The Grid [27] | 0.0702 | 0.4119 | 2.5471 | 0.2062  | 19.7144   | 0.9048          | 0.9287            | 0.9648            |
| 060_0130          | VGGT [39]         | 0.0667 | 0.1502 | 1.1690 | 0.1537  | 14.9592   | 0.9117          | 0.9690            | 0.9863            |
|                   | $\pi^3$ [41]      | 0.0890 | 0.2444 | 1.3208 | 0.1683  | 16.6218   | 0.9153          | 0.9667            | 0.9832            |
|                   | AnySplat [12]     | 0.1042 | 0.2600 | 1.5541 | 0.2142  | 20.9316   | 0.8619          | 0.9374            | 0.9694            |
|                   | WorldMirror [24]  | 0.0853 | 0.2490 | 1.5230 | 0.1985  | 19.4070   | 0.8880          | 0.9390            | 0.9664            |
|                   | Off The Grid [27] | 0.0746 | 0.2131 | 1.4497 | 0.1777  | 17.1687   | 0.8933          | 0.9505            | 0.9777            |
| 070_0123          | VGGT [39]         | 0.1291 | 0.1753 | 1.1021 | 0.2467  | 24.4999   | 0.8577          | 0.9595            | 0.9785            |
|                   | $\pi^3$ [41]      | 0.1586 | 0.3453 | 1.4533 | 0.2741  | 26.4879   | 0.8019          | 0.9230            | 0.9814            |
|                   | AnySplat [12]     | 0.2923 | 1.3748 | 3.2881 | 0.7107  | 57.4414   | 0.6265          | 0.6871            | 0.6948            |
|                   | WorldMirror [24]  | 0.2169 | 0.9059 | 2.6614 | 0.4815  | 38.5976   | 0.6817          | 0.6986            | 0.7495            |
|                   | Off The Grid [27] | 0.2318 | 1.1762 | 3.0598 | 0.5922  | 47.8341   | 0.6472          | 0.6920            | 0.7020            |

Table 17. Detailed depth estimation metrics. Sparse setup with 6 input views.

| Scene             | Method            | AbsRel | SqRel  | RMSE   | RMSElog | SILogRMSE | $\delta < 1.25$ | $\delta < 1.25^2$ | $\delta < 1.25^3$ |
|-------------------|-------------------|--------|--------|--------|---------|-----------|-----------------|-------------------|-------------------|
| <b>Sparse - 6</b> |                   |        |        |        |         |           |                 |                   |                   |
| 010_0050          | VGGT [39]         | 0.0386 | 0.0308 | 0.3738 | 0.1008  | 10.0573   | 0.9793          | 0.9892            | 0.9931            |
|                   | $\pi^3$ [41]      | 0.0936 | 0.0704 | 0.5619 | 0.1415  | 13.6577   | 0.9668          | 0.9882            | 0.9924            |
|                   | AnySplat [12]     | 0.1052 | 0.1055 | 0.7010 | 0.1824  | 17.3366   | 0.9182          | 0.9678            | 0.9804            |
|                   | WorldMirror [24]  | 0.0844 | 0.0595 | 0.4749 | 0.1325  | 12.1565   | 0.9668          | 0.9886            | 0.9933            |
|                   | Off The Grid [27] | 0.0644 | 0.0439 | 0.4365 | 0.1156  | 10.8250   | 0.9742          | 0.9892            | 0.9934            |
| 020_0020          | VGGT [39]         | 0.0509 | 0.4635 | 3.0440 | 0.1094  | 10.8750   | 0.9585          | 0.9854            | 0.9960            |
|                   | $\pi^3$ [41]      | 0.0446 | 0.8677 | 5.0822 | 0.1035  | 10.2253   | 0.9697          | 0.9892            | 0.9957            |
|                   | AnySplat [12]     | 0.0719 | 0.4439 | 3.8024 | 0.1567  | 15.4027   | 0.9289          | 0.9575            | 0.9910            |
|                   | WorldMirror [24]  | 0.0829 | 0.6337 | 4.5660 | 0.1906  | 18.6662   | 0.9293          | 0.9520            | 0.9601            |
|                   | Off The Grid [27] | 0.0553 | 0.3349 | 3.2387 | 0.1251  | 12.3423   | 0.9404          | 0.9723            | 0.9965            |
| 040_0040          | VGGT [39]         | 0.1933 | 0.3757 | 1.6565 | 0.4911  | 48.0870   | 0.6815          | 0.8854            | 0.9455            |
|                   | $\pi^3$ [41]      | 0.1346 | 0.5148 | 1.8790 | 0.2306  | 21.1488   | 0.8721          | 0.9550            | 0.9702            |
|                   | AnySplat [12]     | 0.4437 | 1.2103 | 2.8123 | 0.5310  | 45.4136   | 0.4678          | 0.6715            | 0.7782            |
|                   | WorldMirror [24]  | 0.4001 | 1.2215 | 3.0998 | 0.5460  | 48.1019   | 0.4293          | 0.6851            | 0.7748            |
|                   | Off The Grid [27] | 0.3126 | 0.9739 | 2.9501 | 0.4600  | 40.8367   | 0.5049          | 0.7194            | 0.7832            |
| 050_0130          | VGGT [39]         | 0.1752 | 0.5769 | 1.9830 | 0.2967  | 27.5389   | 0.7614          | 0.8404            | 0.9256            |
|                   | $\pi^3$ [41]      | 0.0729 | 0.1373 | 1.0172 | 0.1592  | 15.5054   | 0.9607          | 0.9798            | 0.9877            |
|                   | AnySplat [12]     | 0.1337 | 0.2507 | 1.3956 | 0.2120  | 20.5207   | 0.8435          | 0.9573            | 0.9766            |
|                   | WorldMirror [24]  | 0.2815 | 0.9104 | 2.4190 | 0.3351  | 30.0013   | 0.5850          | 0.7645            | 0.9524            |
|                   | Off The Grid [27] | 0.1375 | 0.2642 | 1.3709 | 0.1996  | 18.3756   | 0.7931          | 0.9567            | 0.9873            |
| 050_0160          | VGGT [39]         | 0.0739 | 0.4873 | 2.5899 | 0.2002  | 19.1492   | 0.9033          | 0.9425            | 0.9629            |
|                   | $\pi^3$ [41]      | 0.0627 | 0.3965 | 2.2990 | 0.1560  | 14.7332   | 0.9266          | 0.9601            | 0.9705            |
|                   | AnySplat [12]     | 0.0820 | 0.4352 | 2.4356 | 0.1838  | 17.8875   | 0.9097          | 0.9534            | 0.9697            |
|                   | WorldMirror [24]  | 0.0890 | 0.4927 | 2.5502 | 0.2057  | 19.8418   | 0.8825          | 0.9386            | 0.9714            |
|                   | Off The Grid [27] | 0.0765 | 0.4954 | 2.5926 | 0.1912  | 18.1907   | 0.9017          | 0.9511            | 0.9679            |
| 060_0100          | VGGT [39]         | 0.0454 | 0.2380 | 1.7258 | 0.1499  | 14.5144   | 0.9399          | 0.9596            | 0.9772            |
|                   | $\pi^3$ [41]      | 0.0513 | 0.1788 | 1.4952 | 0.1271  | 12.5858   | 0.9446          | 0.9740            | 0.9870            |
|                   | AnySplat [12]     | 0.1029 | 0.3056 | 1.8994 | 0.1763  | 17.3989   | 0.8809          | 0.9658            | 0.9839            |
|                   | WorldMirror [24]  | 0.0490 | 0.2315 | 1.7115 | 0.1427  | 13.7679   | 0.9304          | 0.9636            | 0.9819            |
|                   | Off The Grid [27] | 0.0507 | 0.2489 | 1.7723 | 0.1532  | 14.8380   | 0.9375          | 0.9580            | 0.9777            |
| 060_0130          | VGGT [39]         | 0.0621 | 0.1626 | 1.1437 | 0.1656  | 15.8632   | 0.9014          | 0.9523            | 0.9866            |
|                   | $\pi^3$ [41]      | 0.0721 | 0.1510 | 1.0231 | 0.1471  | 14.4746   | 0.9210          | 0.9768            | 0.9882            |
|                   | AnySplat [12]     | 0.0969 | 0.2213 | 1.3474 | 0.2007  | 19.6314   | 0.8696          | 0.9311            | 0.9760            |
|                   | WorldMirror [24]  | 0.0725 | 0.2253 | 1.3837 | 0.1914  | 18.4365   | 0.8899          | 0.9313            | 0.9719            |
|                   | Off The Grid [27] | 0.0654 | 0.1887 | 1.2788 | 0.1714  | 16.5206   | 0.8945          | 0.9422            | 0.9820            |
| 070_0123          | VGGT [39]         | 0.1266 | 0.2263 | 1.2742 | 0.2550  | 25.2260   | 0.8415          | 0.9457            | 0.9761            |
|                   | $\pi^3$ [41]      | 0.1887 | 0.6186 | 1.9118 | 0.3101  | 30.3717   | 0.7714          | 0.8642            | 0.9689            |
|                   | AnySplat [12]     | 0.2460 | 1.0286 | 2.8448 | 0.6251  | 54.5802   | 0.6519          | 0.7351            | 0.7773            |
|                   | WorldMirror [24]  | 0.1616 | 0.6445 | 2.2366 | 0.3998  | 34.6964   | 0.7415          | 0.7784            | 0.8440            |
|                   | Off The Grid [27] | 0.1961 | 0.8687 | 2.6214 | 0.4974  | 42.2995   | 0.6826          | 0.7411            | 0.7697            |



Table 18. Detailed depth estimation metrics. Sparse setup with 9 input views.

| Scene             | Method            | AbsRel | SqRel  | RMSE   | RMSElog | SILogRMSE | $\delta < 1.25$ | $\delta < 1.25^2$ | $\delta < 1.25^3$ |
|-------------------|-------------------|--------|--------|--------|---------|-----------|-----------------|-------------------|-------------------|
| <b>Sparse - 9</b> |                   |        |        |        |         |           |                 |                   |                   |
| 010_0050          | VGGT [39]         | 0.0415 | 0.0328 | 0.3891 | 0.1036  | 10.3371   | 0.9770          | 0.9893            | 0.9931            |
|                   | $\pi^3$ [41]      | 0.1060 | 0.0940 | 0.6143 | 0.1588  | 14.4751   | 0.9229          | 0.9870            | 0.9925            |
|                   | AnySplat [12]     | 0.1272 | 0.1557 | 0.7958 | 0.2099  | 18.5962   | 0.8489          | 0.9476            | 0.9773            |
|                   | WorldMirror [24]  | 0.0672 | 0.0476 | 0.4304 | 0.1177  | 11.1590   | 0.9712          | 0.9893            | 0.9931            |
|                   | Off The Grid [27] | 0.0702 | 0.0498 | 0.4492 | 0.1197  | 10.7324   | 0.9639          | 0.9893            | 0.9934            |
| 020_0020          | VGGT [39]         | 0.0506 | 0.3610 | 2.6892 | 0.1063  | 10.5500   | 0.9617          | 0.9879            | 0.9957            |
|                   | $\pi^3$ [41]      | 0.0424 | 1.3279 | 5.1201 | 0.1039  | 10.3135   | 0.9739          | 0.9898            | 0.9961            |
|                   | AnySplat [12]     | 0.0809 | 0.4594 | 3.6461 | 0.1641  | 16.1285   | 0.9238          | 0.9597            | 0.9853            |
|                   | WorldMirror [24]  | 0.0792 | 0.5351 | 3.9046 | 0.1694  | 16.6574   | 0.9348          | 0.9567            | 0.9749            |
|                   | Off The Grid [27] | 0.0585 | 0.3285 | 3.0135 | 0.1247  | 12.3135   | 0.9433          | 0.9737            | 0.9962            |
| 040_0040          | VGGT [39]         | 0.2089 | 0.4080 | 1.7607 | 0.8937  | 86.1219   | 0.6783          | 0.8756            | 0.9303            |
|                   | $\pi^3$ [41]      | 0.1285 | 0.4792 | 1.9420 | 0.2375  | 22.1147   | 0.8819          | 0.9560            | 0.9751            |
|                   | AnySplat [12]     | 0.5371 | 1.6376 | 2.9323 | 0.5710  | 48.5978   | 0.4530          | 0.6438            | 0.7358            |
|                   | WorldMirror [24]  | 0.5214 | 1.5265 | 3.1305 | 0.5912  | 51.0275   | 0.4209          | 0.6500            | 0.7401            |
|                   | Off The Grid [27] | 0.3813 | 1.0179 | 2.9236 | 0.4890  | 43.8275   | 0.4687          | 0.6831            | 0.7462            |
| 050_0130          | VGGT [39]         | 0.1577 | 0.4974 | 1.8479 | 0.2762  | 25.6943   | 0.7911          | 0.8660            | 0.9381            |
|                   | $\pi^3$ [41]      | 0.0665 | 0.1416 | 1.0398 | 0.1583  | 15.6107   | 0.9624          | 0.9791            | 0.9877            |
|                   | AnySplat [12]     | 0.1515 | 0.3182 | 1.5661 | 0.2291  | 22.2138   | 0.7756          | 0.9508            | 0.9735            |
|                   | WorldMirror [24]  | 0.2374 | 0.6740 | 2.0765 | 0.2997  | 27.4988   | 0.6667          | 0.8145            | 0.9632            |
|                   | Off The Grid [27] | 0.1238 | 0.2367 | 1.3211 | 0.1915  | 17.8870   | 0.8154          | 0.9667            | 0.9875            |
| 050_0160          | VGGT [39]         | 0.0858 | 0.6524 | 2.9497 | 0.2134  | 20.1845   | 0.8878          | 0.9281            | 0.9550            |
|                   | $\pi^3$ [41]      | 0.0676 | 0.4008 | 2.1045 | 0.1452  | 13.9383   | 0.9248          | 0.9574            | 0.9788            |
|                   | AnySplat [12]     | 0.1020 | 0.5350 | 2.6015 | 0.1871  | 18.2725   | 0.8780          | 0.9436            | 0.9629            |
|                   | WorldMirror [24]  | 0.1049 | 0.6640 | 2.9359 | 0.2202  | 20.9178   | 0.8814          | 0.9311            | 0.9592            |
|                   | Off The Grid [27] | 0.0959 | 0.6242 | 2.8529 | 0.1936  | 18.7097   | 0.8826          | 0.9421            | 0.9594            |
| 060_0100          | VGGT [39]         | 0.0548 | 0.3309 | 2.0659 | 0.1754  | 16.8105   | 0.9246          | 0.9454            | 0.9693            |
|                   | $\pi^3$ [41]      | 0.0540 | 0.2247 | 1.7086 | 0.1418  | 14.0411   | 0.9382          | 0.9704            | 0.9844            |
|                   | AnySplat [12]     | 0.1079 | 0.3662 | 2.1131 | 0.1972  | 19.3531   | 0.8720          | 0.9539            | 0.9769            |
|                   | WorldMirror [24]  | 0.0574 | 0.3060 | 1.9938 | 0.1647  | 15.8422   | 0.9248          | 0.9512            | 0.9759            |
|                   | Off The Grid [27] | 0.0610 | 0.3287 | 2.0656 | 0.1744  | 16.7305   | 0.9242          | 0.9450            | 0.9733            |
| 060_0130          | VGGT [39]         | 0.0671 | 0.1816 | 1.2383 | 0.1637  | 15.7171   | 0.8939          | 0.9486            | 0.9890            |
|                   | $\pi^3$ [41]      | 0.0815 | 0.2821 | 1.4447 | 0.1595  | 15.8363   | 0.9156          | 0.9646            | 0.9854            |
|                   | AnySplat [12]     | 0.1054 | 0.2774 | 1.5760 | 0.2133  | 20.8340   | 0.8569          | 0.9384            | 0.9687            |
|                   | WorldMirror [24]  | 0.0740 | 0.2312 | 1.4470 | 0.1792  | 17.3756   | 0.8822          | 0.9497            | 0.9791            |
|                   | Off The Grid [27] | 0.0873 | 0.2606 | 1.5321 | 0.1902  | 18.3467   | 0.8620          | 0.9357            | 0.9768            |
| 070_0123          | VGGT [39]         | 0.1122 | 0.2208 | 1.2988 | 0.2595  | 25.5815   | 0.8680          | 0.9501            | 0.9738            |
|                   | $\pi^3$ [41]      | 0.1805 | 0.5938 | 1.9004 | 0.3093  | 30.1874   | 0.7672          | 0.8788            | 0.9674            |
|                   | AnySplat [12]     | 0.2396 | 1.0590 | 2.9081 | 0.6109  | 52.9396   | 0.6652          | 0.7190            | 0.7584            |
|                   | WorldMirror [24]  | 0.1671 | 0.6761 | 2.3002 | 0.3999  | 34.4464   | 0.7151          | 0.7728            | 0.8401            |
|                   | Off The Grid [27] | 0.1852 | 0.8235 | 2.5781 | 0.4613  | 38.8309   | 0.7010          | 0.7266            | 0.7793            |

Table 19. Detailed depth estimation metrics. Dense setup with 25 input views.

| Scene        | Method            | AbsRel | SqRel  | RMSE   | RMSElog | SILogRMSE | $\delta < 1.25$ | $\delta < 1.25^2$ | $\delta < 1.25^3$ |
|--------------|-------------------|--------|--------|--------|---------|-----------|-----------------|-------------------|-------------------|
| <b>Dense</b> |                   |        |        |        |         |           |                 |                   |                   |
| 010_0050     | VGGT [39]         | 0.0312 | 0.0337 | 0.3753 | 0.1047  | 10.4473   | 0.9788          | 0.9885            | 0.9921            |
|              | $\pi^3$ [41]      | 0.0879 | 0.0630 | 0.5076 | 0.1411  | 13.2870   | 0.9664          | 0.9884            | 0.9921            |
|              | AnySplat [12]     | 0.1317 | 0.1532 | 0.8063 | 0.2130  | 18.9588   | 0.8643          | 0.9605            | 0.9761            |
|              | WorldMirror [24]  | 0.0526 | 0.0465 | 0.4033 | 0.1123  | 10.7314   | 0.9775          | 0.9883            | 0.9920            |
|              | Off The Grid [27] | 0.0507 | 0.0454 | 0.4188 | 0.1133  | 10.5141   | 0.9720          | 0.9876            | 0.9920            |
| 020_0020     | VGGT [39]         | 0.0518 | 0.4178 | 3.0458 | 0.1172  | 11.5911   | 0.9535          | 0.9810            | 0.9934            |
|              | $\pi^3$ [41]      | 0.0464 | 2.2847 | 6.2739 | 0.1103  | 10.9041   | 0.9735          | 0.9902            | 0.9957            |
|              | AnySplat [12]     | 0.0810 | 0.4541 | 3.5800 | 0.1669  | 16.3078   | 0.9136          | 0.9608            | 0.9834            |
|              | WorldMirror [24]  | 0.0802 | 0.5121 | 3.7161 | 0.1657  | 16.2621   | 0.9184          | 0.9576            | 0.9826            |
|              | Off The Grid [27] | 0.0560 | 0.3184 | 2.9185 | 0.1248  | 12.2733   | 0.9409          | 0.9771            | 0.9950            |
| 040_0040     | VGGT [39]         | 0.2152 | 0.5485 | 2.1211 | 0.8447  | 80.3829   | 0.6930          | 0.8671            | 0.9327            |
|              | $\pi^3$ [41]      | 0.2068 | 2.2485 | 2.6524 | 0.2883  | 25.4533   | 0.7819          | 0.9418            | 0.9656            |
|              | AnySplat [12]     | 0.6159 | 3.9625 | 4.1638 | 0.6325  | 52.2592   | 0.4780          | 0.6384            | 0.7488            |
|              | WorldMirror [24]  | 0.4435 | 1.5952 | 3.4119 | 0.5619  | 46.5230   | 0.5027          | 0.6646            | 0.7529            |
|              | Off The Grid [27] | 0.3411 | 1.2489 | 3.1404 | 0.4781  | 40.3046   | 0.5909          | 0.7038            | 0.7747            |
| 050_0130     | VGGT [39]         | 0.1571 | 0.4815 | 1.8926 | 0.2463  | 23.6430   | 0.7721          | 0.9314            | 0.9698            |
|              | $\pi^3$ [41]      | 0.1031 | 0.2528 | 1.4344 | 0.1793  | 17.1634   | 0.9051          | 0.9819            | 0.9889            |
|              | AnySplat [12]     | 0.1435 | 0.4153 | 1.9693 | 0.2409  | 23.5019   | 0.7932          | 0.9526            | 0.9738            |
|              | WorldMirror [24]  | 0.2111 | 0.7493 | 2.4049 | 0.2739  | 24.7972   | 0.6248          | 0.8911            | 0.9890            |
|              | Off The Grid [27] | 0.1579 | 0.3958 | 1.8772 | 0.2255  | 20.7421   | 0.7038          | 0.9503            | 0.9914            |
| 050_0160     | VGGT [39]         | 0.1097 | 0.7404 | 3.1286 | 0.2291  | 21.5425   | 0.8062          | 0.8999            | 0.9535            |
|              | $\pi^3$ [41]      | 0.0977 | 0.4646 | 2.2054 | 0.1665  | 16.4205   | 0.8809          | 0.9621            | 0.9885            |
|              | AnySplat [12]     | 0.1168 | 0.5550 | 2.7481 | 0.2150  | 20.4769   | 0.8028          | 0.9234            | 0.9723            |
|              | WorldMirror [24]  | 0.1126 | 0.8538 | 3.3703 | 0.2456  | 23.0448   | 0.8329          | 0.8990            | 0.9336            |
|              | Off The Grid [27] | 0.1050 | 0.7665 | 3.2627 | 0.2283  | 21.1278   | 0.8287          | 0.8950            | 0.9526            |
| 060_0100     | VGGT [39]         | 0.1129 | 0.5084 | 2.6266 | 0.4126  | 39.6676   | 0.8244          | 0.9252            | 0.9611            |
|              | $\pi^3$ [41]      | 0.0565 | 0.2307 | 1.7994 | 0.1182  | 11.6046   | 0.9511          | 0.9863            | 0.9912            |
|              | AnySplat [12]     | 0.0874 | 0.3362 | 2.2263 | 0.1817  | 17.5729   | 0.9126          | 0.9647            | 0.9778            |
|              | WorldMirror [24]  | 0.1027 | 0.6000 | 3.0451 | 0.1965  | 18.4886   | 0.8255          | 0.9205            | 0.9756            |
|              | Off The Grid [27] | 0.0815 | 0.4164 | 2.5842 | 0.1679  | 15.9304   | 0.8588          | 0.9654            | 0.9863            |
| 060_0130     | VGGT [39]         | 0.0923 | 0.1685 | 1.1927 | 0.1793  | 17.6281   | 0.8714          | 0.9611            | 0.9871            |
|              | $\pi^3$ [41]      | 0.3074 | 3.6503 | 3.7785 | 0.3613  | 32.7155   | 0.7932          | 0.8413            | 0.8718            |
|              | AnySplat [12]     | 0.1834 | 0.6119 | 1.8422 | 0.2606  | 24.2317   | 0.7827          | 0.8905            | 0.9470            |
|              | WorldMirror [24]  | 0.1409 | 0.4509 | 1.7138 | 0.2360  | 22.2069   | 0.8287          | 0.9087            | 0.9610            |
|              | Off The Grid [27] | 0.1212 | 0.2707 | 1.4184 | 0.2007  | 18.6510   | 0.8477          | 0.9417            | 0.9824            |
| 070_0123     | VGGT [39]         | 0.0799 | 0.2009 | 1.1791 | 0.2335  | 22.9907   | 0.9184          | 0.9628            | 0.9808            |
|              | $\pi^3$ [41]      | 0.0962 | 0.2369 | 1.2912 | 0.2286  | 22.4427   | 0.9197          | 0.9768            | 0.9852            |
|              | AnySplat [12]     | 0.2639 | 0.7540 | 2.3608 | 0.5618  | 51.9873   | 0.6017          | 0.7957            | 0.8926            |
|              | WorldMirror [24]  | 0.2342 | 0.7584 | 2.4209 | 0.4262  | 35.9075   | 0.5681          | 0.6089            | 0.8907            |
|              | Off The Grid [27] | 0.1824 | 0.6256 | 2.1930 | 0.3596  | 29.9965   | 0.5861          | 0.7960            | 0.9230            |

Table 20. Detailed novel view synthesis metrics. Sparse setup with 3 and 6 input views.

| Scene             | Method            | PSNR  | SSIM   | LPIPS  | MUSIQ | PSNR  | SSIM   | LPIPS  | MUSIQ |
|-------------------|-------------------|-------|--------|--------|-------|-------|--------|--------|-------|
| <b>Sparse - 3</b> |                   |       |        |        |       |       |        |        |       |
| 010_0050          | AnySplat [12]     | 10.25 | 0.7318 | 0.5962 | 49.40 | 10.89 | 0.7528 | 0.5773 | 50.05 |
|                   | WorldMirror [24]  | 18.70 | 0.8435 | 0.5197 | 36.52 | 21.61 | 0.8695 | 0.4828 | 35.89 |
|                   | Off The Grid [27] | 16.43 | 0.8057 | 0.5841 | 50.18 | 16.84 | 0.8117 | 0.5724 | 47.78 |
| 020_0020          | AnySplat [12]     | 15.00 | 0.4088 | 0.6585 | 44.66 | 15.29 | 0.4701 | 0.6044 | 45.80 |
|                   | WorldMirror [24]  | 21.74 | 0.4496 | 0.6674 | 33.47 | 24.85 | 0.5490 | 0.5673 | 37.66 |
|                   | Off The Grid [27] | 18.18 | 0.4675 | 0.6601 | 42.73 | 18.84 | 0.5273 | 0.6209 | 39.50 |
| 040_0040          | AnySplat [12]     | 11.89 | 0.6785 | 0.6221 | 63.59 | 13.37 | 0.7015 | 0.5842 | 64.27 |
|                   | WorldMirror [24]  | 15.90 | 0.7393 | 0.5697 | 43.85 | 18.78 | 0.7656 | 0.5346 | 48.29 |
|                   | Off The Grid [27] | 16.88 | 0.7333 | 0.6076 | 64.62 | 19.71 | 0.7615 | 0.5667 | 62.11 |
| 050_0130          | AnySplat [12]     | 12.41 | 0.7538 | 0.5110 | 46.32 | 11.20 | 0.7468 | 0.4744 | 45.06 |
|                   | WorldMirror [24]  | 19.85 | 0.8355 | 0.4588 | 33.61 | 22.37 | 0.8643 | 0.4142 | 33.12 |
|                   | Off The Grid [27] | 16.22 | 0.7878 | 0.4603 | 50.82 | 17.36 | 0.8128 | 0.4239 | 47.82 |
| 050_0160          | AnySplat [12]     | 11.55 | 0.7548 | 0.5546 | 52.34 | 13.20 | 0.7779 | 0.5269 | 54.01 |
|                   | WorldMirror [24]  | 14.95 | 0.7930 | 0.5157 | 44.53 | 20.07 | 0.8469 | 0.4559 | 43.02 |
|                   | Off The Grid [27] | 14.92 | 0.7869 | 0.5335 | 55.14 | 20.35 | 0.8512 | 0.4884 | 49.73 |
| 060_0100          | AnySplat [12]     | 14.16 | 0.7549 | 0.5787 | 53.83 | 15.41 | 0.7853 | 0.5336 | 53.06 |
|                   | WorldMirror [24]  | 19.11 | 0.8084 | 0.5349 | 44.31 | 21.70 | 0.8361 | 0.4927 | 44.35 |
|                   | Off The Grid [27] | 17.52 | 0.7933 | 0.5724 | 54.12 | 22.15 | 0.8445 | 0.5044 | 50.98 |
| 060_0130          | AnySplat [12]     | 11.62 | 0.6898 | 0.6295 | 51.53 | 13.19 | 0.7336 | 0.5923 | 50.94 |
|                   | WorldMirror [24]  | 16.18 | 0.7684 | 0.5834 | 45.20 | 19.91 | 0.8098 | 0.5265 | 45.89 |
|                   | Off The Grid [27] | 16.46 | 0.7696 | 0.5977 | 54.56 | 19.12 | 0.8051 | 0.5612 | 52.42 |
| 070_0123          | AnySplat [12]     | 10.07 | 0.6786 | 0.6795 | 55.40 | 14.10 | 0.7571 | 0.5816 | 60.12 |
|                   | WorldMirror [24]  | 13.38 | 0.6622 | 0.6335 | 38.06 | 18.27 | 0.8011 | 0.5788 | 39.57 |
|                   | Off The Grid [27] | 17.97 | 0.7960 | 0.5837 | 61.10 | 18.26 | 0.7997 | 0.5747 | 58.99 |
| <b>Sparse - 6</b> |                   |       |        |        |       |       |        |        |       |
| 010_0050          | AnySplat [12]     | 12.34 | 0.7649 | 0.5769 | 42.97 | 14.17 | 0.7984 | 0.5385 | 42.57 |
|                   | WorldMirror [24]  | 21.45 | 0.8641 | 0.4918 | 33.96 | 21.81 | 0.8666 | 0.4845 | 33.01 |
|                   | Off The Grid [27] | 17.97 | 0.8324 | 0.5456 | 45.48 | 19.14 | 0.8424 | 0.5263 | 40.63 |
| 020_0020          | AnySplat [12]     | 8.95  | 0.3721 | 0.6495 | 47.67 | 18.19 | 0.4921 | 0.5932 | 43.77 |
|                   | WorldMirror [24]  | 22.89 | 0.4930 | 0.6282 | 36.22 | 26.32 | 0.6064 | 0.5440 | 37.37 |
|                   | Off The Grid [27] | 16.43 | 0.4133 | 0.6603 | 43.26 | 21.52 | 0.5704 | 0.5956 | 39.66 |
| 040_0040          | AnySplat [12]     | 14.86 | 0.7130 | 0.5786 | 64.48 | 15.90 | 0.7263 | 0.5566 | 64.44 |
|                   | WorldMirror [24]  | 18.36 | 0.7560 | 0.5512 | 45.01 | 19.86 | 0.7702 | 0.5269 | 45.34 |
|                   | Off The Grid [27] | 17.67 | 0.7368 | 0.5728 | 65.36 | 19.88 | 0.7619 | 0.5424 | 62.36 |
| 050_0130          | AnySplat [12]     | 14.59 | 0.7895 | 0.4989 | 45.50 | 14.60 | 0.8017 | 0.4512 | 44.23 |
|                   | WorldMirror [24]  | 19.73 | 0.8383 | 0.4587 | 29.62 | 22.47 | 0.8559 | 0.4136 | 29.55 |
|                   | Off The Grid [27] | 18.24 | 0.8295 | 0.4369 | 49.89 | 20.26 | 0.8576 | 0.3867 | 46.83 |
| 050_0160          | AnySplat [12]     | 14.00 | 0.7873 | 0.5290 | 53.48 | 16.68 | 0.8160 | 0.4928 | 52.41 |
|                   | WorldMirror [24]  | 13.57 | 0.7708 | 0.5254 | 46.94 | 20.79 | 0.8466 | 0.4467 | 42.14 |
|                   | Off The Grid [27] | 13.43 | 0.7631 | 0.5325 | 58.81 | 22.00 | 0.8630 | 0.4689 | 50.72 |
| 060_0100          | AnySplat [12]     | 16.47 | 0.7850 | 0.5491 | 53.68 | 18.28 | 0.8095 | 0.5119 | 53.57 |
|                   | WorldMirror [24]  | 19.55 | 0.8138 | 0.5270 | 43.60 | 22.99 | 0.8470 | 0.4765 | 44.06 |
|                   | Off The Grid [27] | 17.68 | 0.7977 | 0.5570 | 53.26 | 23.31 | 0.8499 | 0.4859 | 50.01 |
| 060_0130          | AnySplat [12]     | 12.66 | 0.7180 | 0.6172 | 49.07 | 14.70 | 0.7545 | 0.5802 | 49.49 |
|                   | WorldMirror [24]  | 17.35 | 0.7792 | 0.5713 | 43.07 | 20.56 | 0.8166 | 0.5166 | 44.09 |
|                   | Off The Grid [27] | 16.49 | 0.7721 | 0.5875 | 53.79 | 21.04 | 0.8288 | 0.5245 | 51.68 |
| 070_0123          | AnySplat [12]     | 13.45 | 0.7383 | 0.6214 | 53.54 | 15.01 | 0.7655 | 0.5848 | 54.26 |
|                   | WorldMirror [24]  | 17.56 | 0.7968 | 0.5991 | 33.17 | 20.16 | 0.8208 | 0.5493 | 34.06 |
|                   | Off The Grid [27] | 18.06 | 0.7967 | 0.5887 | 58.86 | 20.21 | 0.8217 | 0.5346 | 55.92 |

Table 21. Detailed novel view synthesis metrics. Sparse setup with 9 input views and Dense setup with 25 input views.

| Scene             | Method            | PSNR  | SSIM   | LPIPS  | MUSIQ | PSNR  | SSIM   | LPIPS  | MUSIQ |
|-------------------|-------------------|-------|--------|--------|-------|-------|--------|--------|-------|
| <b>Sparse - 9</b> |                   |       |        |        |       |       |        |        |       |
| 010_0050          | AnySplat [12]     | 16.86 | 0.8318 | 0.5299 | 43.15 | 18.75 | 0.8524 | 0.4956 | 41.21 |
|                   | WorldMirror [24]  | 22.26 | 0.8768 | 0.4890 | 31.97 | 22.87 | 0.8812 | 0.4799 | 31.82 |
|                   | Off The Grid [27] | 20.28 | 0.8627 | 0.5099 | 40.99 | 21.21 | 0.8704 | 0.4936 | 37.67 |
| 020_0020          | AnySplat [12]     | 12.24 | 0.4064 | 0.6476 | 45.00 | 22.23 | 0.5455 | 0.5661 | 41.54 |
|                   | WorldMirror [24]  | 23.22 | 0.5126 | 0.6213 | 36.81 | 26.44 | 0.6326 | 0.5479 | 36.57 |
|                   | Off The Grid [27] | 19.15 | 0.4395 | 0.6477 | 43.00 | 24.20 | 0.6248 | 0.5694 | 38.29 |
| 040_0040          | AnySplat [12]     | 17.13 | 0.7322 | 0.5473 | 63.72 | 18.42 | 0.7495 | 0.5201 | 63.34 |
|                   | WorldMirror [24]  | 18.47 | 0.7597 | 0.5563 | 41.06 | 20.17 | 0.7727 | 0.5336 | 40.79 |
|                   | Off The Grid [27] | 18.02 | 0.7408 | 0.5521 | 62.88 | 21.22 | 0.7782 | 0.5053 | 60.22 |
| 050_0130          | AnySplat [12]     | 18.47 | 0.8267 | 0.4760 | 44.09 | 19.84 | 0.8653 | 0.4062 | 43.57 |
|                   | WorldMirror [24]  | 19.27 | 0.8294 | 0.4709 | 26.47 | 22.55 | 0.8766 | 0.4059 | 25.60 |
|                   | Off The Grid [27] | 20.32 | 0.8642 | 0.4159 | 46.74 | 23.18 | 0.8908 | 0.3692 | 43.21 |
| 050_0160          | AnySplat [12]     | 15.46 | 0.8143 | 0.5036 | 48.06 | 19.93 | 0.8439 | 0.4627 | 49.50 |
|                   | WorldMirror [24]  | 14.52 | 0.7879 | 0.5190 | 45.82 | 22.11 | 0.8617 | 0.4455 | 41.52 |
|                   | Off The Grid [27] | 13.95 | 0.7771 | 0.5142 | 57.02 | 23.99 | 0.8778 | 0.4327 | 49.21 |
| 060_0100          | AnySplat [12]     | 19.22 | 0.8131 | 0.5214 | 51.46 | 21.45 | 0.8361 | 0.4876 | 50.75 |
|                   | WorldMirror [24]  | 20.80 | 0.8277 | 0.5171 | 41.44 | 24.67 | 0.8652 | 0.4666 | 41.76 |
|                   | Off The Grid [27] | 18.48 | 0.8068 | 0.5405 | 51.61 | 25.35 | 0.8698 | 0.4566 | 48.22 |
| 060_0130          | AnySplat [12]     | 14.86 | 0.7515 | 0.5965 | 46.77 | 17.68 | 0.7919 | 0.5467 | 47.23 |
|                   | WorldMirror [24]  | 18.03 | 0.7897 | 0.5653 | 39.89 | 22.87 | 0.8401 | 0.4975 | 40.20 |
|                   | Off The Grid [27] | 17.36 | 0.7835 | 0.5682 | 51.37 | 22.64 | 0.8403 | 0.4983 | 47.95 |
| 070_0123          | AnySplat [12]     | 17.95 | 0.7985 | 0.5669 | 53.79 | 18.44 | 0.8018 | 0.5527 | 52.72 |
|                   | WorldMirror [24]  | 18.97 | 0.8178 | 0.5806 | 28.99 | 21.27 | 0.8360 | 0.5423 | 28.61 |
|                   | Off The Grid [27] | 18.14 | 0.8016 | 0.5877 | 56.96 | 20.37 | 0.8233 | 0.5346 | 53.94 |
| <b>Dense</b>      |                   |       |        |        |       |       |        |        |       |
| 010_0050          | AnySplat [12]     | 18.02 | 0.8333 | 0.5261 | 40.44 | 22.46 | 0.8783 | 0.4690 | 40.40 |
|                   | WorldMirror [24]  | 20.49 | 0.8687 | 0.5120 | 28.49 | 24.01 | 0.8916 | 0.4797 | 29.29 |
|                   | Off The Grid [27] | 21.42 | 0.8735 | 0.4875 | 35.95 | 24.64 | 0.9009 | 0.4519 | 34.58 |
| 020_0020          | AnySplat [12]     | 21.38 | 0.4718 | 0.6447 | 36.39 | 25.74 | 0.5647 | 0.5732 | 33.09 |
|                   | WorldMirror [24]  | 22.24 | 0.4866 | 0.6517 | 31.83 | 26.57 | 0.6405 | 0.5730 | 30.53 |
|                   | Off The Grid [27] | 20.98 | 0.4514 | 0.6521 | 40.05 | 26.16 | 0.6413 | 0.5761 | 35.53 |
| 040_0040          | AnySplat [12]     | 16.20 | 0.6795 | 0.5727 | 56.81 | 20.62 | 0.7278 | 0.5210 | 56.50 |
|                   | WorldMirror [24]  | 17.96 | 0.7145 | 0.5759 | 32.83 | 21.75 | 0.7500 | 0.5390 | 32.92 |
|                   | Off The Grid [27] | 17.66 | 0.6977 | 0.5646 | 51.80 | 21.65 | 0.7467 | 0.5138 | 47.20 |
| 050_0130          | AnySplat [12]     | 23.05 | 0.8799 | 0.4019 | 34.86 | 26.83 | 0.9165 | 0.3464 | 34.57 |
|                   | WorldMirror [24]  | 23.99 | 0.8942 | 0.3852 | 27.50 | 28.26 | 0.9272 | 0.3397 | 28.49 |
|                   | Off The Grid [27] | 25.44 | 0.9092 | 0.3568 | 37.27 | 29.21 | 0.9352 | 0.3222 | 35.44 |
| 050_0160          | AnySplat [12]     | 18.32 | 0.8239 | 0.5132 | 47.57 | 24.14 | 0.8615 | 0.4638 | 45.88 |
|                   | WorldMirror [24]  | 19.48 | 0.8323 | 0.5030 | 45.72 | 26.06 | 0.8753 | 0.4475 | 46.27 |
|                   | Off The Grid [27] | 17.17 | 0.8156 | 0.5071 | 56.13 | 28.51 | 0.8937 | 0.4170 | 50.68 |
| 060_0100          | AnySplat [12]     | 21.76 | 0.8726 | 0.4913 | 45.69 | 25.28 | 0.8880 | 0.4579 | 45.17 |
|                   | WorldMirror [24]  | 22.08 | 0.8757 | 0.4885 | 34.43 | 26.51 | 0.9015 | 0.4449 | 34.77 |
|                   | Off The Grid [27] | 23.52 | 0.8783 | 0.4635 | 45.56 | 27.82 | 0.9111 | 0.4213 | 42.47 |
| 060_0130          | AnySplat [12]     | 17.14 | 0.7702 | 0.6098 | 40.43 | 22.64 | 0.8297 | 0.5188 | 40.66 |
|                   | WorldMirror [24]  | 17.84 | 0.7826 | 0.6004 | 30.89 | 23.29 | 0.8386 | 0.5194 | 31.08 |
|                   | Off The Grid [27] | 19.16 | 0.7962 | 0.5594 | 47.71 | 25.07 | 0.8562 | 0.4774 | 44.72 |
| 070_0123          | AnySplat [12]     | 15.93 | 0.7379 | 0.5956 | 48.68 | 18.25 | 0.7881 | 0.5577 | 49.52 |
|                   | WorldMirror [24]  | 18.46 | 0.7924 | 0.5831 | 25.15 | 20.66 | 0.8232 | 0.5538 | 25.06 |
|                   | Off The Grid [27] | 16.82 | 0.7683 | 0.5787 | 40.47 | 20.30 | 0.8233 | 0.5306 | 38.36 |

Table 22. Evaluation of Charge dataset - results per scene for Dynamic Dense setup.

| Scene        | Method      | PNSR  | PNSR-D | PNSR-S | SSIM  | SSIM-D | LPIPS | LPIPS-D | $FOV_O$ |
|--------------|-------------|-------|--------|--------|-------|--------|-------|---------|---------|
| <b>Dense</b> |             |       |        |        |       |        |       |         |         |
| 010_0050     | 4DGS [43]   | 31.62 | 33.32  | 31.33  | 0.946 | 0.938  | 0.151 | 0.203   | 0.669   |
|              | STG [22]    | 32.40 | 34.34  | 32.04  | 0.950 | 0.945  | 0.130 | 0.161   | 0.669   |
|              | Ex4DGS [16] | 32.99 | 34.14  | 32.79  | 0.952 | 0.943  | 0.121 | 0.164   | 0.669   |
| 020_0020     | 4DGS [43]   | 27.14 | 28.74  | 27.13  | 0.708 | 0.633  | 0.412 | 0.580   | 0.797   |
|              | STG [22]    | 26.34 | 31.54  | 26.31  | 0.708 | 0.689  | 0.282 | 0.489   | 0.797   |
|              | Ex4DGS [16] | 26.99 | 31.77  | 26.95  | 0.767 | 0.682  | 0.267 | 0.503   | 0.797   |
| 040_0040     | 4DGS [43]   | 23.16 | 22.63  | 24.07  | 0.775 | 0.737  | 0.379 | 0.436   | 0.849   |
|              | STG [22]    | 24.45 | 25.20  | 24.47  | 0.813 | 0.794  | 0.264 | 0.284   | 0.849   |
|              | Ex4DGS [16] | 24.65 | 25.16  | 25.06  | 0.805 | 0.774  | 0.291 | 0.345   | 0.849   |
| 050_0130     | 4DGS [43]   | 31.35 | 24.04  | 41.68  | 0.949 | 0.884  | 0.140 | 0.300   | 0.433   |
|              | STG [22]    | 32.92 | 25.96  | 40.78  | 0.954 | 0.901  | 0.129 | 0.265   | 0.433   |
|              | Ex4DGS [16] | 32.74 | 26.11  | 39.49  | 0.956 | 0.907  | 0.114 | 0.223   | 0.433   |
| 050_0160     | 4DGS [43]   | 33.63 | 32.50  | 33.96  | 0.936 | 0.922  | 0.154 | 0.173   | 0.592   |
|              | STG [22]    | 32.19 | 31.24  | 32.41  | 0.934 | 0.919  | 0.138 | 0.171   | 0.592   |
|              | Ex4DGS [16] | 34.92 | 33.12  | 35.28  | 0.947 | 0.931  | 0.098 | 0.138   | 0.592   |
| 060_0100     | 4DGS [43]   | 33.43 | 28.87  | 34.86  | 0.944 | 0.915  | 0.145 | 0.250   | 0.732   |
|              | STG [22]    | 34.17 | 31.15  | 34.92  | 0.948 | 0.926  | 0.118 | 0.192   | 0.732   |
|              | Ex4DGS [16] | 34.42 | 31.93  | 35.05  | 0.950 | 0.930  | 0.109 | 0.186   | 0.732   |
| 060_0130     | 4DGS [43]   | 25.56 | 20.50  | 31.56  | 0.891 | 0.865  | 0.266 | 0.302   | 0.680   |
|              | STG [22]    | 27.91 | 23.13  | 32.19  | 0.907 | 0.888  | 0.203 | 0.244   | 0.680   |
|              | Ex4DGS [16] | 28.19 | 24.56  | 30.90  | 0.911 | 0.893  | 0.185 | 0.216   | 0.680   |
| 070_0123     | 4DGS [43]   | 25.62 | 24.14  | 30.18  | 0.900 | 0.890  | 0.202 | 0.215   | 0.840   |
|              | STG [22]    | 23.93 | 22.60  | 27.54  | 0.877 | 0.866  | 0.281 | 0.301   | 0.840   |
|              | Ex4DGS [16] | 23.07 | 21.74  | 27.05  | 0.858 | 0.844  | 0.311 | 0.334   | 0.840   |

Table 23. Evaluation of Charge dataset - results per scene for Dynamic Sparse setup - part 1.

|               | Method      | Views | PNSR  | PNSR-D | PNSR-S | SSIM  | SSIM-D | LPIPS | LPIPS-D | $FOV_O$ |
|---------------|-------------|-------|-------|--------|--------|-------|--------|-------|---------|---------|
| <b>Sparse</b> |             |       |       |        |        |       |        |       |         |         |
| 010_0050      | 4DGS [43]   | 3     | 19.29 | 27.11  | 18.30  | 0.847 | 0.869  | 0.295 | 0.307   | 0.514   |
|               |             | 6     | 22.70 | 31.28  | 21.72  | 0.891 | 0.913  | 0.222 | 0.237   | 0.595   |
|               |             | 9     | 28.54 | 31.81  | 27.97  | 0.927 | 0.924  | 0.201 | 0.264   | 0.601   |
|               | STG [22]    | 3     | 18.93 | 27.19  | 17.91  | 0.845 | 0.863  | 0.302 | 0.311   | 0.514   |
|               |             | 6     | 21.73 | 31.17  | 20.66  | 0.884 | 0.906  | 0.251 | 0.270   | 0.595   |
|               |             | 9     | 23.48 | 32.04  | 22.47  | 0.901 | 0.915  | 0.225 | 0.259   | 0.601   |
|               | Ex4DGS [16] | 3     | 18.35 | 26.02  | 17.36  | 0.836 | 0.864  | 0.310 | 0.305   | 0.514   |
|               |             | 6     | 21.07 | 28.71  | 20.19  | 0.876 | 0.895  | 0.250 | 0.255   | 0.595   |
|               |             | 9     | 22.95 | 32.25  | 21.95  | 0.905 | 0.918  | 0.200 | 0.216   | 0.601   |
| 020_0020      | 4DGS [43]   | 3     | 23.50 | 26.52  | 23.47  | 0.590 | 0.557  | 0.421 | 0.559   | 0.634   |
|               |             | 6     | 25.45 | 27.62  | 25.43  | 0.663 | 0.596  | 0.410 | 0.591   | 0.734   |
|               |             | 9     | 26.39 | 28.98  | 26.37  | 0.699 | 0.623  | 0.389 | 0.583   | 0.762   |
|               | STG [22]    | 3     | 20.14 | 24.72  | 20.11  | 0.461 | 0.474  | 0.393 | 0.433   | 0.634   |
|               |             | 6     | 22.84 | 27.11  | 22.81  | 0.583 | 0.561  | 0.354 | 0.438   | 0.734   |
|               |             | 9     | 24.80 | 28.30  | 24.78  | 0.658 | 0.609  | 0.354 | 0.525   | 0.762   |
|               | Ex4DGS [16] | 3     | 21.86 | 23.47  | 21.86  | 0.541 | 0.452  | 0.331 | 0.432   | 0.634   |
|               |             | 6     | 23.81 | 27.19  | 23.78  | 0.638 | 0.549  | 0.293 | 0.421   | 0.734   |
|               |             | 9     | 24.65 | 28.51  | 24.62  | 0.700 | 0.595  | 0.266 | 0.424   | 0.762   |



Table 24. Evaluation of Charge dataset - results per scene for Dynamic Sparse setup - part 2.

|          | Method      | Views | PNSR  | PNSR-D | PNSR-S | SSIM  | SSIM-D | LPIPS | LPIPS-D | $FOV_O$ |
|----------|-------------|-------|-------|--------|--------|-------|--------|-------|---------|---------|
| Sparse   |             |       |       |        |        |       |        |       |         |         |
| 040_0040 | 4DGS [43]   | 3     | 16.95 | 15.81  | 17.70  | 0.680 | 0.632  | 0.452 | 0.494   | 0.610   |
|          |             | 6     | 21.44 | 21.79  | 21.36  | 0.786 | 0.757  | 0.318 | 0.355   | 0.704   |
|          |             | 9     | 23.60 | 24.29  | 23.59  | 0.828 | 0.799  | 0.253 | 0.301   | 0.731   |
|          | STG [22]    | 3     | 17.94 | 18.86  | 17.63  | 0.731 | 0.703  | 0.402 | 0.425   | 0.610   |
|          |             | 6     | 21.08 | 23.25  | 20.35  | 0.800 | 0.774  | 0.313 | 0.350   | 0.704   |
|          |             | 9     | 22.35 | 24.47  | 21.71  | 0.819 | 0.794  | 0.283 | 0.333   | 0.731   |
|          | Ex4DGS [16] | 3     | 15.68 | 15.09  | 16.06  | 0.620 | 0.580  | 0.535 | 0.566   | 0.610   |
|          |             | 6     | 16.50 | 15.32  | 17.38  | 0.696 | 0.654  | 0.512 | 0.565   | 0.704   |
|          |             | 9     | 23.93 | 23.62  | 24.24  | 0.827 | 0.799  | 0.274 | 0.340   | 0.731   |
| 050_0130 | 4DGS [43]   | 3     | 24.40 | 18.83  | 27.93  | 0.903 | 0.811  | 0.192 | 0.349   | 0.340   |
|          |             | 6     | 28.99 | 24.39  | 31.38  | 0.938 | 0.881  | 0.140 | 0.248   | 0.375   |
|          |             | 9     | 30.07 | 25.36  | 32.74  | 0.944 | 0.888  | 0.133 | 0.244   | 0.398   |
|          | STG [22]    | 3     | 24.00 | 19.08  | 26.72  | 0.896 | 0.809  | 0.203 | 0.362   | 0.340   |
|          |             | 6     | 27.38 | 22.23  | 30.21  | 0.925 | 0.855  | 0.175 | 0.321   | 0.375   |
|          |             | 9     | 29.49 | 23.14  | 34.20  | 0.936 | 0.871  | 0.159 | 0.300   | 0.398   |
|          | Ex4DGS [16] | 3     | 22.81 | 16.86  | 26.90  | 0.886 | 0.785  | 0.212 | 0.368   | 0.340   |
|          |             | 6     | 27.70 | 23.67  | 29.64  | 0.934 | 0.880  | 0.138 | 0.225   | 0.375   |
|          |             | 9     | 29.06 | 25.75  | 30.70  | 0.944 | 0.899  | 0.121 | 0.192   | 0.398   |
| 050_0160 | 4DGS [43]   | 3     | 18.55 | 24.89  | 18.32  | 0.812 | 0.806  | 0.300 | 0.303   | 0.543   |
|          |             | 6     | 23.95 | 29.34  | 23.75  | 0.877 | 0.870  | 0.190 | 0.202   | 0.624   |
|          |             | 9     | 26.56 | 29.93  | 26.43  | 0.913 | 0.891  | 0.139 | 0.186   | 0.636   |
|          | STG [22]    | 3     | 16.82 | 20.01  | 16.68  | 0.793 | 0.739  | 0.356 | 0.408   | 0.543   |
|          |             | 6     | 22.91 | 24.40  | 22.89  | 0.884 | 0.832  | 0.198 | 0.290   | 0.624   |
|          |             | 9     | 26.22 | 25.73  | 26.36  | 0.913 | 0.854  | 0.159 | 0.275   | 0.636   |
|          | Ex4DGS [16] | 3     | 20.07 | 26.04  | 19.85  | 0.824 | 0.817  | 0.266 | 0.270   | 0.543   |
|          |             | 6     | 22.51 | 28.88  | 22.32  | 0.859 | 0.868  | 0.198 | 0.202   | 0.624   |
|          |             | 9     | 22.87 | 30.55  | 22.62  | 0.877 | 0.881  | 0.170 | 0.186   | 0.636   |
| 060_0100 | 4DGS [43]   | 3     | 18.56 | 19.38  | 18.63  | 0.812 | 0.774  | 0.355 | 0.394   | 0.635   |
|          |             | 6     | 26.08 | 24.52  | 26.61  | 0.885 | 0.844  | 0.268 | 0.343   | 0.737   |
|          |             | 9     | 29.01 | 26.47  | 29.92  | 0.911 | 0.874  | 0.199 | 0.277   | 0.756   |
|          | STG [22]    | 3     | 18.06 | 18.81  | 18.03  | 0.781 | 0.745  | 0.403 | 0.428   | 0.635   |
|          |             | 6     | 22.80 | 22.68  | 22.86  | 0.849 | 0.820  | 0.286 | 0.351   | 0.737   |
|          |             | 9     | 25.48 | 24.52  | 25.71  | 0.877 | 0.846  | 0.239 | 0.319   | 0.756   |
|          | Ex4DGS [16] | 3     | 20.47 | 20.66  | 20.59  | 0.810 | 0.775  | 0.323 | 0.374   | 0.635   |
|          |             | 6     | 25.00 | 23.93  | 25.32  | 0.872 | 0.837  | 0.239 | 0.314   | 0.737   |
|          |             | 9     | 27.43 | 26.25  | 27.79  | 0.901 | 0.871  | 0.191 | 0.265   | 0.756   |
| 060_0130 | 4DGS [43]   | 3     | 17.70 | 14.21  | 19.10  | 0.770 | 0.691  | 0.442 | 0.502   | 0.520   |
|          |             | 6     | 20.76 | 17.27  | 22.80  | 0.822 | 0.767  | 0.377 | 0.425   | 0.594   |
|          |             | 9     | 23.06 | 18.05  | 27.07  | 0.871 | 0.823  | 0.287 | 0.345   | 0.622   |
|          | STG [22]    | 3     | 16.32 | 14.25  | 16.96  | 0.728 | 0.661  | 0.488 | 0.543   | 0.520   |
|          |             | 6     | 18.94 | 16.06  | 20.00  | 0.787 | 0.729  | 0.417 | 0.491   | 0.594   |
|          |             | 9     | 20.55 | 16.94  | 22.04  | 0.820 | 0.763  | 0.364 | 0.461   | 0.622   |
|          | Ex4DGS [16] | 3     | 17.66 | 14.83  | 18.61  | 0.748 | 0.670  | 0.453 | 0.508   | 0.520   |
|          |             | 6     | 21.26 | 19.13  | 22.09  | 0.820 | 0.772  | 0.351 | 0.391   | 0.594   |
|          |             | 9     | 23.24 | 20.84  | 24.33  | 0.850 | 0.810  | 0.292 | 0.339   | 0.622   |
| 070_0123 | 4DGS [43]   | 3     | 18.74 | 18.90  | 18.80  | 0.794 | 0.783  | 0.406 | 0.418   | 0.621   |
|          |             | 6     | 22.09 | 22.95  | 21.25  | 0.857 | 0.847  | 0.295 | 0.304   | 0.705   |
|          |             | 9     | 26.12 | 27.15  | 25.51  | 0.901 | 0.895  | 0.204 | 0.208   | 0.744   |
|          | STG [22]    | 3     | 18.22 | 18.29  | 18.27  | 0.786 | 0.776  | 0.418 | 0.429   | 0.621   |
|          |             | 6     | 21.43 | 21.97  | 20.78  | 0.847 | 0.839  | 0.363 | 0.373   | 0.705   |
|          |             | 9     | 23.79 | 24.55  | 22.99  | 0.877 | 0.870  | 0.293 | 0.303   | 0.744   |
|          | Ex4DGS [16] | 3     | 19.34 | 19.74  | 19.15  | 0.805 | 0.795  | 0.367 | 0.378   | 0.621   |
|          |             | 6     | 18.70 | 19.54  | 17.77  | 0.806 | 0.796  | 0.409 | 0.415   | 0.705   |
|          |             | 9     | 21.85 | 22.33  | 21.58  | 0.868 | 0.860  | 0.284 | 0.291   | 0.744   |

Table 25. Evaluation of Charge dataset - results per scene for Dynamic Mono - Spline Fast and Mono - Spline Slow.

| Scene                     | Method      | PNSR  | PNSR-D | PNSR-S | SSIM  | SSIM-D | LPIPS | LPIPS-D | FOV <sub>O</sub> |
|---------------------------|-------------|-------|--------|--------|-------|--------|-------|---------|------------------|
| <b>Mono - Spline Fast</b> |             |       |        |        |       |        |       |         |                  |
| 010_0050                  | 4DGS [43]   | 28.88 | 29.76  | 28.77  | 0.926 | 0.916  | 0.158 | 0.218   | 0.318            |
|                           | D-3DGS [44] | 28.36 | 30.98  | 28.03  | 0.932 | 0.924  | 0.110 | 0.141   | 0.318            |
|                           | SC-GS [11]  | 22.64 | 32.15  | 21.59  | 0.902 | 0.912  | 0.153 | 0.156   | 0.318            |
|                           | MoSca [17]  | 25.69 | 27.93  | 25.41  | 0.949 | 0.939  | 0.195 | 0.263   | 0.318            |
| 020_0020                  | 4DGS [43]   | 26.32 | 28.15  | 26.31  | 0.667 | 0.606  | 0.421 | 0.598   | 0.413            |
|                           | D-3DGS [44] | 27.84 | 27.67  | 27.89  | 0.816 | 0.633  | 0.167 | 0.400   | 0.413            |
|                           | SC-GS [11]  | 26.41 | 26.93  | 26.43  | 0.727 | 0.586  | 0.217 | 0.468   | 0.413            |
|                           | MoSca [17]  | 23.35 | 23.99  | 23.35  | 0.548 | 0.523  | 0.376 | 0.444   | 0.413            |
| 040_0040                  | 4DGS [43]   | 18.68 | 17.58  | 19.81  | 0.759 | 0.723  | 0.365 | 0.411   | 0.467            |
|                           | D-3DGS [44] | 20.25 | 20.19  | 20.52  | 0.792 | 0.766  | 0.358 | 0.383   | 0.467            |
|                           | SC-GS [11]  | 21.18 | 21.56  | 21.23  | 0.800 | 0.780  | 0.333 | 0.347   | 0.467            |
|                           | MoSca [17]  | 18.57 | 18.61  | 18.68  | 0.797 | 0.772  | 0.415 | 0.443   | 0.467            |
| 050_0130                  | 4DGS [43]   | 26.19 | 19.58  | 33.21  | 0.910 | 0.799  | 0.177 | 0.373   | 0.402            |
|                           | D-3DGS [44] | 24.94 | 18.34  | 31.79  | 0.909 | 0.792  | 0.189 | 0.426   | 0.402            |
|                           | SC-GS [11]  | 25.48 | 18.92  | 31.95  | 0.906 | 0.784  | 0.156 | 0.336   | 0.402            |
|                           | MoSca [17]  | 27.32 | 21.74  | 31.28  | 0.959 | 0.858  | 0.103 | 0.243   | 0.402            |
| 050_0160                  | 4DGS [43]   | 25.52 | 23.39  | 25.85  | 0.866 | 0.820  | 0.201 | 0.252   | 0.335            |
|                           | D-3DGS [44] | 25.58 | 22.55  | 26.19  | 0.882 | 0.810  | 0.190 | 0.282   | 0.335            |
|                           | SC-GS [11]  | 27.21 | 26.99  | 27.37  | 0.893 | 0.864  | 0.177 | 0.205   | 0.335            |
|                           | MoSca [17]  | 24.42 | 24.59  | 24.52  | 0.917 | 0.872  | 0.201 | 0.271   | 0.335            |
| 060_0100                  | 4DGS [43]   | 29.57 | 25.46  | 30.99  | 0.924 | 0.880  | 0.157 | 0.268   | 0.426            |
|                           | D-3DGS [44] | 25.88 | 23.92  | 26.95  | 0.893 | 0.856  | 0.193 | 0.260   | 0.426            |
|                           | SC-GS [11]  | 25.70 | 24.33  | 26.33  | 0.891 | 0.847  | 0.194 | 0.262   | 0.426            |
|                           | MoSca [17]  | 26.42 | 26.67  | 26.56  | 0.947 | 0.914  | 0.150 | 0.221   | 0.426            |
| 060_0130                  | 4DGS [43]   | 21.65 | 17.21  | 25.04  | 0.835 | 0.801  | 0.383 | 0.427   | 0.354            |
|                           | D-3DGS [44] | 21.78 | 16.81  | 26.47  | 0.865 | 0.830  | 0.236 | 0.290   | 0.354            |
|                           | SC-GS [11]  | 21.42 | 17.45  | 24.53  | 0.820 | 0.799  | 0.289 | 0.325   | 0.354            |
|                           | MoSca [17]  | 22.11 | 19.80  | 23.24  | 0.877 | 0.846  | 0.295 | 0.342   | 0.354            |
| 070_0123                  | 4DGS [43]   | 22.01 | 20.42  | 28.05  | 0.831 | 0.808  | 0.251 | 0.270   | 0.476            |
|                           | D-3DGS [44] | 24.40 | 22.84  | 30.04  | 0.863 | 0.846  | 0.169 | 0.173   | 0.476            |
|                           | SC-GS [11]  | 21.75 | 20.20  | 27.72  | 0.832 | 0.810  | 0.216 | 0.229   | 0.476            |
|                           | MoSca [17]  | 19.27 | 19.39  | 19.73  | 0.833 | 0.811  | 0.308 | 0.333   | 0.476            |
| <b>Mono - Spline Slow</b> |             |       |        |        |       |        |       |         |                  |
| 010_0050                  | 4DGS [43]   | 23.00 | 26.09  | 22.40  | 0.882 | 0.884  | 0.220 | 0.271   | 0.351            |
|                           | D-3DGS [44] | 22.87 | 28.15  | 22.02  | 0.888 | 0.889  | 0.152 | 0.176   | 0.351            |
|                           | SC-GS [11]  | 22.03 | 29.94  | 21.00  | 0.895 | 0.899  | 0.169 | 0.169   | 0.351            |
|                           | MoSca [17]  | 24.71 | 28.16  | 24.15  | 0.951 | 0.944  | 0.159 | 0.232   | 0.351            |
| 020_0020                  | 4DGS [43]   | 25.69 | 26.10  | 25.71  | 0.638 | 0.574  | 0.428 | 0.615   | 0.428            |
|                           | D-3DGS [44] | 27.20 | 25.24  | 27.27  | 0.807 | 0.586  | 0.150 | 0.383   | 0.428            |
|                           | SC-GS [11]  | 26.10 | 27.14  | 26.10  | 0.757 | 0.595  | 0.189 | 0.430   | 0.428            |
|                           | MoSca [17]  | 23.84 | 25.21  | 23.84  | 0.586 | 0.553  | 0.331 | 0.423   | 0.428            |
| 040_0040                  | 4DGS [43]   | 18.91 | 17.74  | 20.11  | 0.762 | 0.722  | 0.342 | 0.395   | 0.468            |
|                           | D-3DGS [44] | 19.76 | 19.17  | 20.43  | 0.783 | 0.755  | 0.352 | 0.386   | 0.468            |
|                           | SC-GS [11]  | 19.89 | 19.14  | 20.69  | 0.785 | 0.755  | 0.342 | 0.375   | 0.468            |
|                           | MoSca [17]  | 18.92 | 18.37  | 19.55  | 0.808 | 0.773  | 0.393 | 0.446   | 0.468            |
| 050_0130                  | 4DGS [43]   | 26.83 | 19.95  | 34.24  | 0.918 | 0.808  | 0.171 | 0.385   | 0.357            |
|                           | D-3DGS [44] | 25.25 | 18.76  | 31.52  | 0.908 | 0.786  | 0.177 | 0.397   | 0.357            |
|                           | SC-GS [11]  | 25.04 | 18.29  | 31.85  | 0.908 | 0.776  | 0.164 | 0.375   | 0.357            |
|                           | MoSca [17]  | 26.21 | 20.15  | 30.98  | 0.948 | 0.826  | 0.119 | 0.302   | 0.357            |
| 050_0160                  | 4DGS [43]   | 28.98 | 25.49  | 29.71  | 0.912 | 0.856  | 0.170 | 0.223   | 0.353            |
|                           | D-3DGS [44] | 25.88 | 24.29  | 26.32  | 0.865 | 0.819  | 0.174 | 0.230   | 0.353            |
|                           | SC-GS [11]  | 24.64 | 24.92  | 24.75  | 0.865 | 0.832  | 0.199 | 0.226   | 0.353            |
|                           | MoSca [17]  | 22.72 | 24.54  | 22.64  | 0.904 | 0.861  | 0.190 | 0.252   | 0.353            |
| 060_0100                  | 4DGS [43]   | 28.55 | 24.92  | 29.89  | 0.921 | 0.878  | 0.180 | 0.295   | 0.398            |
|                           | D-3DGS [44] | 27.23 | 25.46  | 27.90  | 0.898 | 0.857  | 0.176 | 0.234   | 0.398            |
|                           | SC-GS [11]  | 26.04 | 23.53  | 26.76  | 0.886 | 0.831  | 0.192 | 0.262   | 0.398            |
|                           | MoSca [17]  | 27.94 | 26.68  | 28.35  | 0.945 | 0.908  | 0.149 | 0.235   | 0.398            |
| 060_0130                  | 4DGS [43]   | 21.07 | 16.46  | 24.66  | 0.833 | 0.791  | 0.333 | 0.390   | 0.377            |
|                           | D-3DGS [44] | 21.90 | 17.00  | 26.26  | 0.866 | 0.828  | 0.248 | 0.304   | 0.377            |
|                           | SC-GS [11]  | 21.02 | 17.24  | 23.70  | 0.821 | 0.795  | 0.313 | 0.342   | 0.377            |
|                           | MoSca [17]  | 24.14 | 21.30  | 25.66  | 0.897 | 0.865  | 0.252 | 0.308   | 0.377            |
| 070_0123                  | 4DGS [43]   | 20.44 | 18.88  | 26.51  | 0.809 | 0.783  | 0.287 | 0.311   | 0.475            |
|                           | D-3DGS [44] | 23.39 | 22.14  | 27.44  | 0.852 | 0.834  | 0.199 | 0.208   | 0.475            |
|                           | SC-GS [11]  | 21.55 | 20.15  | 26.33  | 0.824 | 0.803  | 0.236 | 0.251   | 0.475            |
|                           | MoSca [17]  | 19.13 | 18.24  | 21.86  | 0.813 | 0.790  | 0.355 | 0.387   | 0.475            |

Table 26. Evaluation of Charge dataset - results per scene for Dynamic Mono - Random Walk Fast and Mono - Random Walk Slow.

| Scene                   | Method      | PNSR  | PNSR-D | PNSR-S | SSIM  | SSIM-D | LPIPS | LPIPS-D | FOV <sub>O</sub> |
|-------------------------|-------------|-------|--------|--------|-------|--------|-------|---------|------------------|
| <b>Mono - Walk Fast</b> |             |       |        |        |       |        |       |         |                  |
| 010_0050                | 4DGS [43]   | 26.84 | 28.39  | 26.52  | 0.922 | 0.914  | 0.168 | 0.228   | 0.370            |
|                         | D-3DGS [44] | 28.74 | 29.68  | 28.83  | 0.935 | 0.919  | 0.114 | 0.151   | 0.370            |
|                         | SC-GS [11]  | 22.44 | 31.79  | 21.32  | 0.899 | 0.914  | 0.147 | 0.145   | 0.370            |
|                         | MoSca [17]  | 26.21 | 28.77  | 25.78  | 0.959 | 0.950  | 0.151 | 0.223   | 0.370            |
| 020_0020                | 4DGS [43]   | 26.46 | 28.04  | 26.45  | 0.671 | 0.612  | 0.399 | 0.597   | 0.482            |
|                         | D-3DGS [44] | 27.35 | 27.74  | 27.36  | 0.807 | 0.632  | 0.149 | 0.383   | 0.482            |
|                         | SC-GS [11]  | 26.00 | 27.63  | 25.98  | 0.742 | 0.599  | 0.183 | 0.389   | 0.482            |
|                         | MoSca [17]  | 23.97 | 25.03  | 23.96  | 0.601 | 0.548  | 0.329 | 0.410   | 0.482            |
| 040_0040                | 4DGS [43]   | 20.77 | 19.64  | 22.06  | 0.772 | 0.734  | 0.335 | 0.382   | 0.486            |
|                         | D-3DGS [44] | 21.29 | 21.20  | 21.72  | 0.801 | 0.778  | 0.332 | 0.363   | 0.486            |
|                         | SC-GS [11]  | 20.84 | 21.02  | 21.04  | 0.798 | 0.774  | 0.340 | 0.366   | 0.486            |
|                         | MoSca [17]  | 18.92 | 18.55  | 19.54  | 0.806 | 0.774  | 0.394 | 0.445   | 0.486            |
| 050_0130                | 4DGS [43]   | 26.03 | 19.57  | 32.30  | 0.904 | 0.791  | 0.193 | 0.393   | 0.393            |
|                         | D-3DGS [44] | 24.48 | 18.03  | 30.81  | 0.896 | 0.765  | 0.200 | 0.430   | 0.393            |
|                         | SC-GS [11]  | 23.98 | 18.23  | 28.90  | 0.852 | 0.740  | 0.211 | 0.420   | 0.393            |
|                         | MoSca [17]  | 26.98 | 21.20  | 31.48  | 0.947 | 0.849  | 0.137 | 0.294   | 0.393            |
| 050_0160                | 4DGS [43]   | 27.62 | 25.05  | 28.24  | 0.884 | 0.837  | 0.164 | 0.225   | 0.388            |
|                         | D-3DGS [44] | 24.28 | 22.97  | 24.52  | 0.879 | 0.808  | 0.212 | 0.276   | 0.388            |
|                         | SC-GS [11]  | 23.57 | 24.94  | 23.57  | 0.845 | 0.814  | 0.219 | 0.231   | 0.388            |
|                         | MoSca [17]  | 25.30 | 24.90  | 25.50  | 0.911 | 0.870  | 0.171 | 0.239   | 0.388            |
| 060_0100                | 4DGS [43]   | 29.52 | 26.34  | 30.60  | 0.924 | 0.891  | 0.162 | 0.261   | 0.427            |
|                         | D-3DGS [44] | 29.01 | 27.07  | 29.66  | 0.916 | 0.884  | 0.137 | 0.186   | 0.427            |
|                         | SC-GS [11]  | 26.66 | 26.31  | 26.95  | 0.897 | 0.865  | 0.188 | 0.239   | 0.427            |
|                         | MoSca [17]  | 28.20 | 26.50  | 28.65  | 0.946 | 0.908  | 0.145 | 0.227   | 0.427            |
| 060_0130                | 4DGS [43]   | 20.59 | 16.47  | 23.55  | 0.812 | 0.774  | 0.360 | 0.407   | 0.449            |
|                         | D-3DGS [44] | 20.72 | 16.40  | 24.35  | 0.830 | 0.797  | 0.256 | 0.319   | 0.449            |
|                         | SC-GS [11]  | 20.19 | 16.35  | 22.83  | 0.792 | 0.760  | 0.325 | 0.370   | 0.449            |
|                         | MoSca [17]  | 23.15 | 20.70  | 24.58  | 0.882 | 0.852  | 0.271 | 0.317   | 0.449            |
| 070_0123                | 4DGS [43]   | 20.41 | 18.82  | 24.78  | 0.789 | 0.770  | 0.351 | 0.377   | 0.472            |
|                         | D-3DGS [44] | 18.83 | 17.35  | 22.66  | 0.751 | 0.733  | 0.333 | 0.361   | 0.472            |
|                         | SC-GS [11]  | 19.48 | 18.09  | 23.16  | 0.753 | 0.732  | 0.332 | 0.353   | 0.472            |
|                         | MoSca [17]  | 17.82 | 16.50  | 21.20  | 0.803 | 0.783  | 0.410 | 0.447   | 0.472            |
| <b>Mono - Walk Slow</b> |             |       |        |        |       |        |       |         |                  |
| 010_0050                | 4DGS [43]   | 25.50 | 28.16  | 25.00  | 0.912 | 0.906  | 0.179 | 0.235   | 0.405            |
|                         | D-3DGS [44] | 22.92 | 29.43  | 21.97  | 0.882 | 0.891  | 0.146 | 0.163   | 0.405            |
|                         | SC-GS [11]  | 21.80 | 30.54  | 20.69  | 0.890 | 0.896  | 0.163 | 0.163   | 0.405            |
|                         | MoSca [17]  | 25.40 | 29.65  | 24.84  | 0.961 | 0.949  | 0.142 | 0.221   | 0.405            |
| 020_0020                | 4DGS [43]   | 25.61 | 27.51  | 25.60  | 0.650 | 0.600  | 0.406 | 0.592   | 0.478            |
|                         | D-3DGS [44] | 25.78 | 24.92  | 25.80  | 0.766 | 0.519  | 0.150 | 0.375   | 0.478            |
|                         | SC-GS [11]  | 24.83 | 26.72  | 24.82  | 0.663 | 0.559  | 0.179 | 0.351   | 0.478            |
|                         | MoSca [17]  | 25.69 | 27.07  | 25.68  | 0.676 | 0.604  | 0.288 | 0.406   | 0.478            |
| 040_0040                | 4DGS [43]   | 18.96 | 17.63  | 20.35  | 0.754 | 0.703  | 0.341 | 0.407   | 0.480            |
|                         | D-3DGS [44] | 19.71 | 18.98  | 20.40  | 0.785 | 0.747  | 0.350 | 0.393   | 0.480            |
|                         | SC-GS [11]  | 18.98 | 19.50  | 18.97  | 0.788 | 0.759  | 0.348 | 0.375   | 0.480            |
|                         | MoSca [17]  | 19.66 | 19.19  | 20.23  | 0.817 | 0.783  | 0.363 | 0.412   | 0.480            |
| 050_0130                | 4DGS [43]   | 25.51 | 19.02  | 32.12  | 0.905 | 0.787  | 0.181 | 0.394   | 0.407            |
|                         | D-3DGS [44] | 23.92 | 17.43  | 30.22  | 0.896 | 0.763  | 0.198 | 0.439   | 0.407            |
|                         | SC-GS [11]  | 23.66 | 17.26  | 29.68  | 0.885 | 0.744  | 0.204 | 0.445   | 0.407            |
|                         | MoSca [17]  | 26.73 | 21.12  | 30.89  | 0.953 | 0.846  | 0.120 | 0.285   | 0.407            |
| 050_0160                | 4DGS [43]   | 25.52 | 23.86  | 25.82  | 0.860 | 0.821  | 0.192 | 0.247   | 0.434            |
|                         | D-3DGS [44] | 23.40 | 21.41  | 23.87  | 0.820 | 0.777  | 0.211 | 0.294   | 0.434            |
|                         | SC-GS [11]  | 22.20 | 23.34  | 22.17  | 0.831 | 0.803  | 0.238 | 0.273   | 0.434            |
|                         | MoSca [17]  | 25.04 | 24.55  | 25.22  | 0.902 | 0.865  | 0.183 | 0.249   | 0.434            |
| 060_0100                | 4DGS [43]   | 28.49 | 25.38  | 29.74  | 0.912 | 0.877  | 0.181 | 0.274   | 0.428            |
|                         | D-3DGS [44] | 26.36 | 25.44  | 26.90  | 0.885 | 0.841  | 0.188 | 0.248   | 0.428            |
|                         | SC-GS [11]  | 24.79 | 22.91  | 25.47  | 0.882 | 0.832  | 0.202 | 0.269   | 0.428            |
|                         | MoSca [17]  | 28.28 | 26.98  | 28.68  | 0.938 | 0.911  | 0.168 | 0.227   | 0.428            |
| 060_0130                | 4DGS [43]   | 19.25 | 15.28  | 22.00  | 0.790 | 0.752  | 0.382 | 0.428   | 0.447            |
|                         | D-3DGS [44] | 20.90 | 16.74  | 24.22  | 0.826 | 0.802  | 0.291 | 0.332   | 0.447            |
|                         | SC-GS [11]  | 20.77 | 17.20  | 23.13  | 0.808 | 0.785  | 0.309 | 0.338   | 0.447            |
|                         | MoSca [17]  | 24.66 | 21.83  | 26.41  | 0.913 | 0.883  | 0.215 | 0.266   | 0.447            |
| 070_0123                | 4DGS [43]   | 18.18 | 16.58  | 24.49  | 0.757 | 0.725  | 0.355 | 0.387   | 0.478            |
|                         | D-3DGS [44] | 19.85 | 18.52  | 24.69  | 0.775 | 0.756  | 0.279 | 0.298   | 0.478            |
|                         | SC-GS [11]  | 17.85 | 16.41  | 23.16  | 0.742 | 0.714  | 0.308 | 0.332   | 0.478            |
|                         | MoSca [17]  | 18.86 | 18.51  | 19.88  | 0.810 | 0.789  | 0.352 | 0.379   | 0.478            |
